1 **Tolerance induction in memory CD4 T cells is partial and reversible**

2

3 Joshua I Gray<sup>1#</sup>, Shaima Al-Khabouri<sup>1</sup>, Fraser Morton<sup>1</sup>, Eric T Clambey<sup>2</sup>, Laurent Gapin<sup>3</sup>,

4 Jennifer L Matsuda<sup>3</sup>, John W Kappler<sup>3</sup>, Philippa Marrack<sup>3</sup>, Paul Garside<sup>1</sup>, Thomas D Otto<sup>1</sup>,

5 Megan KL MacLeod<sup>1</sup>

6

7 <sup>1</sup>Institute of Infection, Immunity and Inflammation, University of Glasgow, Glasgow, UK

8 <sup>2</sup>Department of Anesthesiology, University of Colorado Denver, Anschutz Medical Campus,

9 Aurora, CO USA 80045

10 <sup>3</sup>National Jewish Health, Denver CO, USA

11 #Current address: Columbia Center for Translational Immunology, Columbia University, New

12 York NY, USA 10032

13

14 **Keywords**

15 Memory CD4 T cells, Tolerance, Proliferation, Mitotic catastrophe

16

17

18 **Abstract**

19

20 Memory T cells respond rapidly in part because they are less reliant on heightened levels of  
21 costimulatory molecules. This presents challenges to silencing memory T cells in tolerance  
22 strategies for autoimmunity or allergy. We find that memory CD4 T cells generated by infection  
23 or immunisation survive secondary activation with antigen delivered without adjuvant,  
24 regardless of their location in secondary lymphoid organs or peripheral tissues. These cells  
25 were, however, functionally altered following a tertiary immunisation with antigen and  
26 adjuvant, proliferating poorly but maintaining their ability to produce inflammatory cytokines.  
27 Transcriptional and cell cycle analysis of these memory CD4 T cells suggest they are unable  
28 to commit fully to cell division potentially because of low expression of DNA repair enzymes.  
29 In contrast, these memory CD4 T cells could proliferate following tertiary reactivation by viral  
30 re-infection. These data suggest that tolerance induction in memory CD4 T cells is partial and  
31 can be reversed.

32

33

34

35

## 36 **Introduction**

37

38 Memory CD4 T cells play central roles in enhancing immune protection against pathogens the  
39 host has previously encountered(Jaigirdar and MacLeod, 2015). However, activated and  
40 memory CD4 T cells also contribute to disease processes in chronic inflammatory conditions,  
41 including rheumatoid arthritis and multiple sclerosis(Cope et al., 2007, McGinley et al., 2018,  
42 Raphael et al., 2020). Most current treatments for these conditions require continued use of  
43 drugs that dampen or deplete immune mediators or cells. A cure for these diseases will require  
44 deletion or retraining of the CD4 T cells that contribute to pathology.

45

46 Antigen-specific tolerance strategies have been used for many years to treat allergies and  
47 there are ongoing trials in autoimmune patients(Gunawardana and Durham, 2018, Pearson  
48 et al., 2017, Rayner and Isaacs, 2018, Serra and Santamaria, 2019) The underlying rationale  
49 for these strategies is based on our knowledge of tolerance induction in T cells, mainly  
50 developed from experiments examining TCR-activation of naïve CD4 T cells in the absence  
51 of costimulatory and inflammatory signals(Greenwald et al., 2005, Miller et al., 2007, Nurieva  
52 et al., 2011). Much less is known about the consequences of activating memory CD4 T cells  
53 through their TCR alone. Memory CD4 T cells can respond more quickly to a secondary  
54 challenge because, in part, they are less reliant on heightened level of costimulatory  
55 signals(Holzer et al., 2003, London et al., 2000, MacLeod et al., 2006). While this contributes  
56 to rapid pathogen control, this presents significant hurdles for treatments that aim to induce  
57 antigen-specific tolerance in autoimmunity, allergy or transplantation(Hartigan et al., 2019,  
58 MacLeod and Anderton, 2015).

59

60 A deeper understanding of the functional and molecular consequences of activating memory  
61 CD4 T cells with TCR signals alone is required to surmount these hurdles. We recently  
62 demonstrated that memory CD4 T cells reactivated with antigen delivered in the absence of  
63 adjuvant return to the memory pool and survive longterm(David et al., 2014). However, tertiary

64 reactivation led to a curtailed response. Here we address two outstanding questions: 1.  
65 whether the consequences of reactivating memory CD4 T cells with antigen alone are similar  
66 in lymphoid organs and peripheral tissues and 2. what the underlying cellular changes  
67 responsible for the curtailed tertiary response are. These are important questions as the  
68 pathology for many autoimmune and allergic conditions is present in peripheral tissues, and  
69 understanding the mechanisms of memory CD4 T cell tolerance is essential to improve  
70 treatments and monitor therapeutic success. Our data show that while memory CD4 T cell  
71 responses are altered following exposure to tolerogenic signals, their ability to respond and  
72 produce inflammatory cytokines is not permanently restrained.

73

## 74 **Results**

75

### 76 **Antigen-specific memory CD4 T cells in lymphoid organs and in peripheral tissues** 77 **respond to tolerogenic signals but fail to increase in number**

78 To investigate the consequence of reactivating memory CD4 T cells with tolerogenic signals  
79 (antigen delivered without adjuvant), we needed to track antigen-specific CD4 T cells following  
80 secondary and tertiary reactivation. To achieve this, we generated memory CD4 T cells in  
81 lymphoid organs and peripheral tissues by infecting C57BL/6 mice with WSN Influenza A virus  
82 (IAV) intranasally (i.n.). We used MHC class II tetramers containing the immunodominant IAV  
83 peptide nucleoprotein (NP)<sub>311-325</sub> to identify NP<sub>311-325</sub>-specific memory CD4 T cells in the  
84 spleen, lung draining mediastinal lymph node (MedLN) and lung (Supplementary Figure 1).

85

86 Previously(David et al., 2014), we delivered antigen intravenously (i.v.) as it is a well-  
87 established tolerogenic injection route(David et al., 2014, Jenkins and Schwartz, 1987, Liblau  
88 et al., 1996). As expected, i.v. injection of NP<sub>311-325</sub> and the adjuvant PolyIC led to an increase  
89 of T cells within the spleen in mice previously infected with IAV. However, there was no  
90 increase in the numbers of antigen-specific CD4 T cells in the MedLN or lung (Supplementary

91 Figure 2). These data suggested that the antigen failed to access the MedLN and lung and  
92 that this delivery route could not be used to address our questions.

93

94 In contrast, i.n. instillation of peptide in the presence (immunogenic) or absence (tolerogenic)  
95 of PolyIC led to reactivation of the memory CD4 T cells in all three organs (Figure 1A-B).  
96 Importantly, delivery of peptide in the absence of adjuvant i.n. to naïve animals led to functional  
97 tolerance of the antigen-specific CD4 T cell population, validating this injection route for  
98 assessment of memory CD4 T cell tolerance induction (Supplementary Figure 3).

99

100 We first examined the immediate consequences of reactivating memory CD4 T cells with  
101 immunogenic or tolerogenic signals. Five days following instillation of NP<sub>311-325</sub> peptide  
102 delivered with or without PolyIC, antigen-specific CD4 T cells showed evidence of activation  
103 via increased expression of the proliferation marker, Ki67, in all three organs (Figure 1B-C).  
104 Memory CD4 T cells reactivated in the presence of adjuvant increased in number as expected  
105 (Figure 1D). In contrast, there was no accumulation of memory CD4 T cells reactivated  
106 following the tolerogenic instillation of peptide alone. This suggests that while these cells  
107 entered the cell cycle, they either failed to complete mitosis or rapidly underwent cell death  
108 following proliferation.

109

110 Gray, Figure 1

111 A

d-30: IAV      d0: NP<sub>311-325</sub> +/- PolyIC i.n.      d5: analysis.

113

114 B

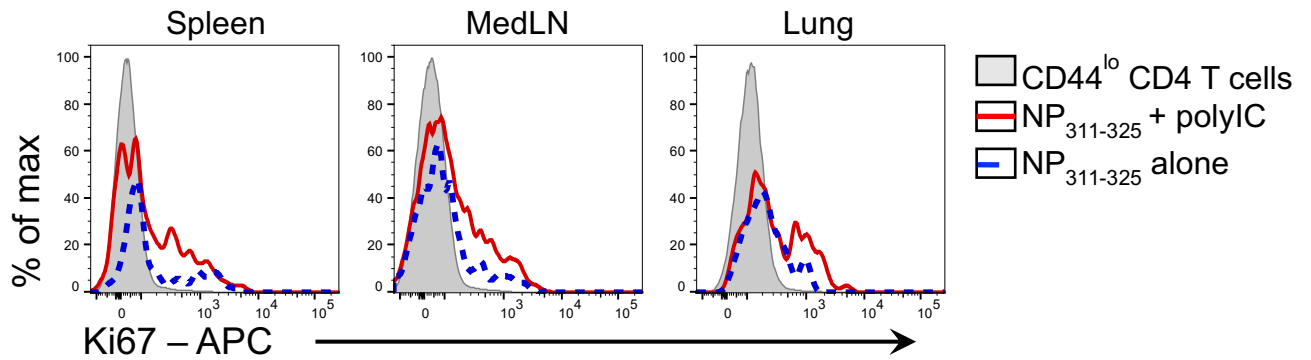

C

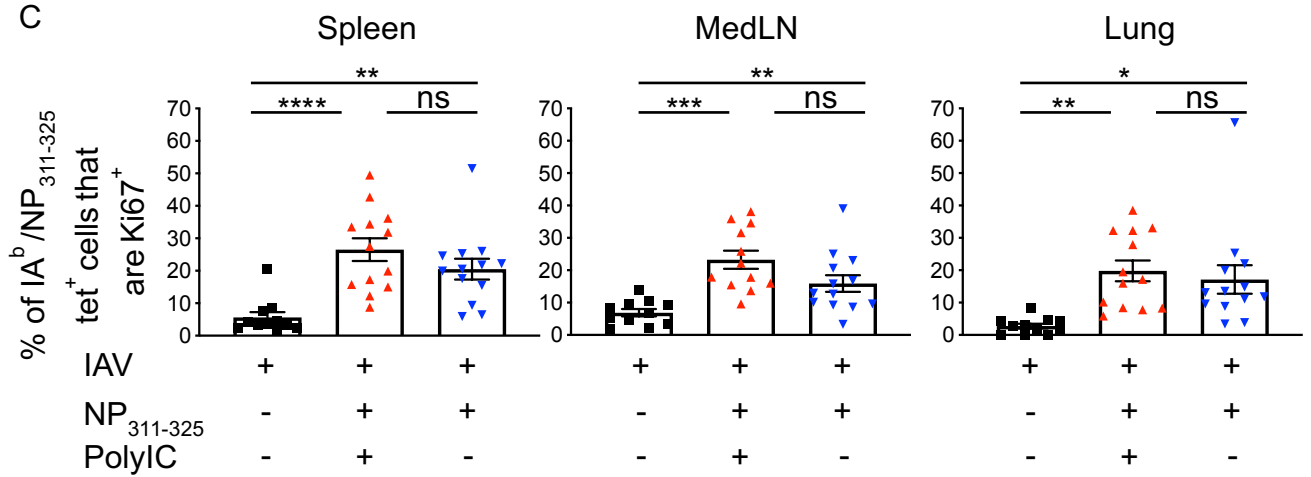

D

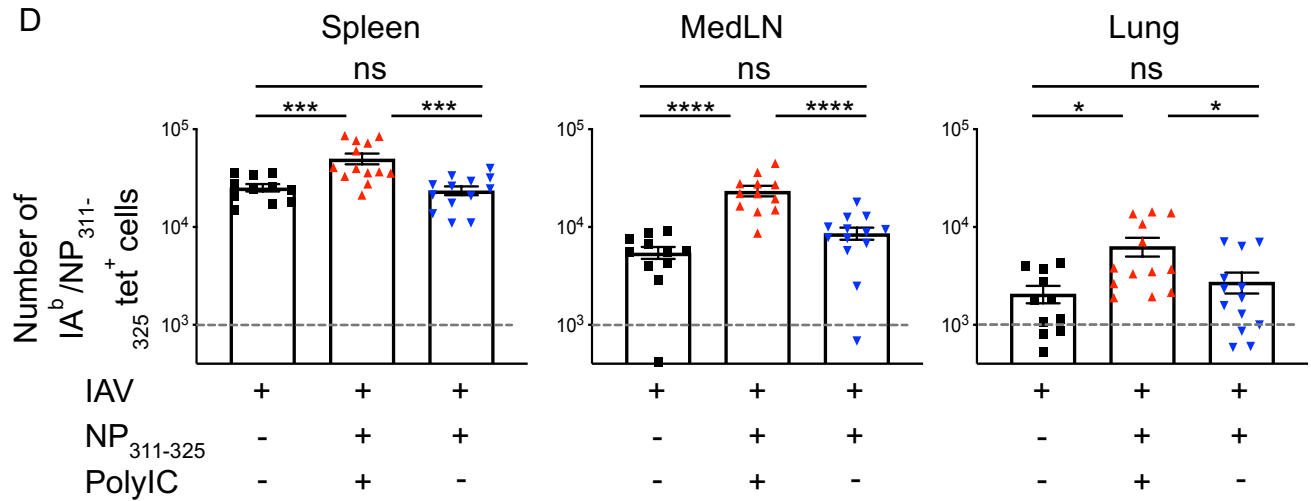

115 **Figure 1: NP<sub>311-325</sub>-specific memory CD4 T cells reactivated with peptide delivered in**  
116 **the absence of adjuvant respond but fail to accumulate**  
117 *C57BL/6 mice were infected with IAV on day -30. On day 0, some of these mice were*  
118 *immunised with NP<sub>311-325</sub>, +/-, PolyIC i.n. IA<sup>b</sup>/NP<sub>311-325</sub> CD4<sup>hi</sup> CD4 T cells were examined 5*  
119 *days later in the spleen, MedLN, and lung (A) and their Ki67 expression (B, C) or their numbers*  
120 *determined (D). In C and D, each symbol represents one mouse and error bars are SEM. In*  
121 *D the grey dashed line represents the background staining in naïve animals. Data are*  
122 *combined from 3 experiments (3-5mice/experiment). Cells are gated as shown in*  
123 *Supplementary Figure 1. All statistics calculated using a one-way ANOVA with multiple*  
124 *comparisons; ns = not significant, \* = <0.05, \*\* = <0.01, \*\*\* = <0.001, \*\*\*\* = <0.0001.*

125  
126

127 **Memory CD4 T cells previously exposed to tolerogenic signals fail to expand upon**  
128 **subsequent reactivation despite entry into the cell cycle**

129

130 To examine the longer term consequences of reactivating memory CD4 T cells with  
131 tolerogenic signals, we set up the experiment displayed in Figure 2A. Thirty days after infection  
132 with IAV, animals were given NP<sub>311-325</sub> i.n. delivered with (immunogenic) or without  
133 (tolerogenic) PolyIC. After a further thirty days, we either examined the memory cells or  
134 performed a tertiary immunisation with NP<sub>311-325</sub> conjugated to ovalbumin (OVA) protein  
135 delivered with the adjuvant alum.

136

137 Prior to tertiary reactivation, there were similar numbers of memory antigen-specific CD4 T  
138 cells in the two groups in each organ (Figure 2B). The antigen-specific CD4 T cells reactivated  
139 with an immunogenic secondary injection were able to mount a robust response in all organs  
140 upon tertiary reactivation. In contrast, the CD4 T cells previously exposed to tolerogenic  
141 signals expanded only slightly in the spleen and not at all in the MedLN and lung. There was,  
142 however, no difference in expression of Ki67 in the reactivated CD4 T cells (Figure 2C).

143

144 We also examined the expression of the pro-survival molecule Bcl2 to determine whether the  
145 memory CD4 T cells were more prone to apoptosis following tolerogenic activation (Figure  
146 2D). However, there were no differences in the expression of Bcl2 between the two groups  
147 regardless of whether we examined the memory or the recalled cells in any of the three  
148 organs. This suggests increased apoptosis could not account for the poor accumulation of the  
149 tertiary reactivated memory CD4 T cells exposed to tolerogenic signals.

150



Gray, Figure 2

151  
152

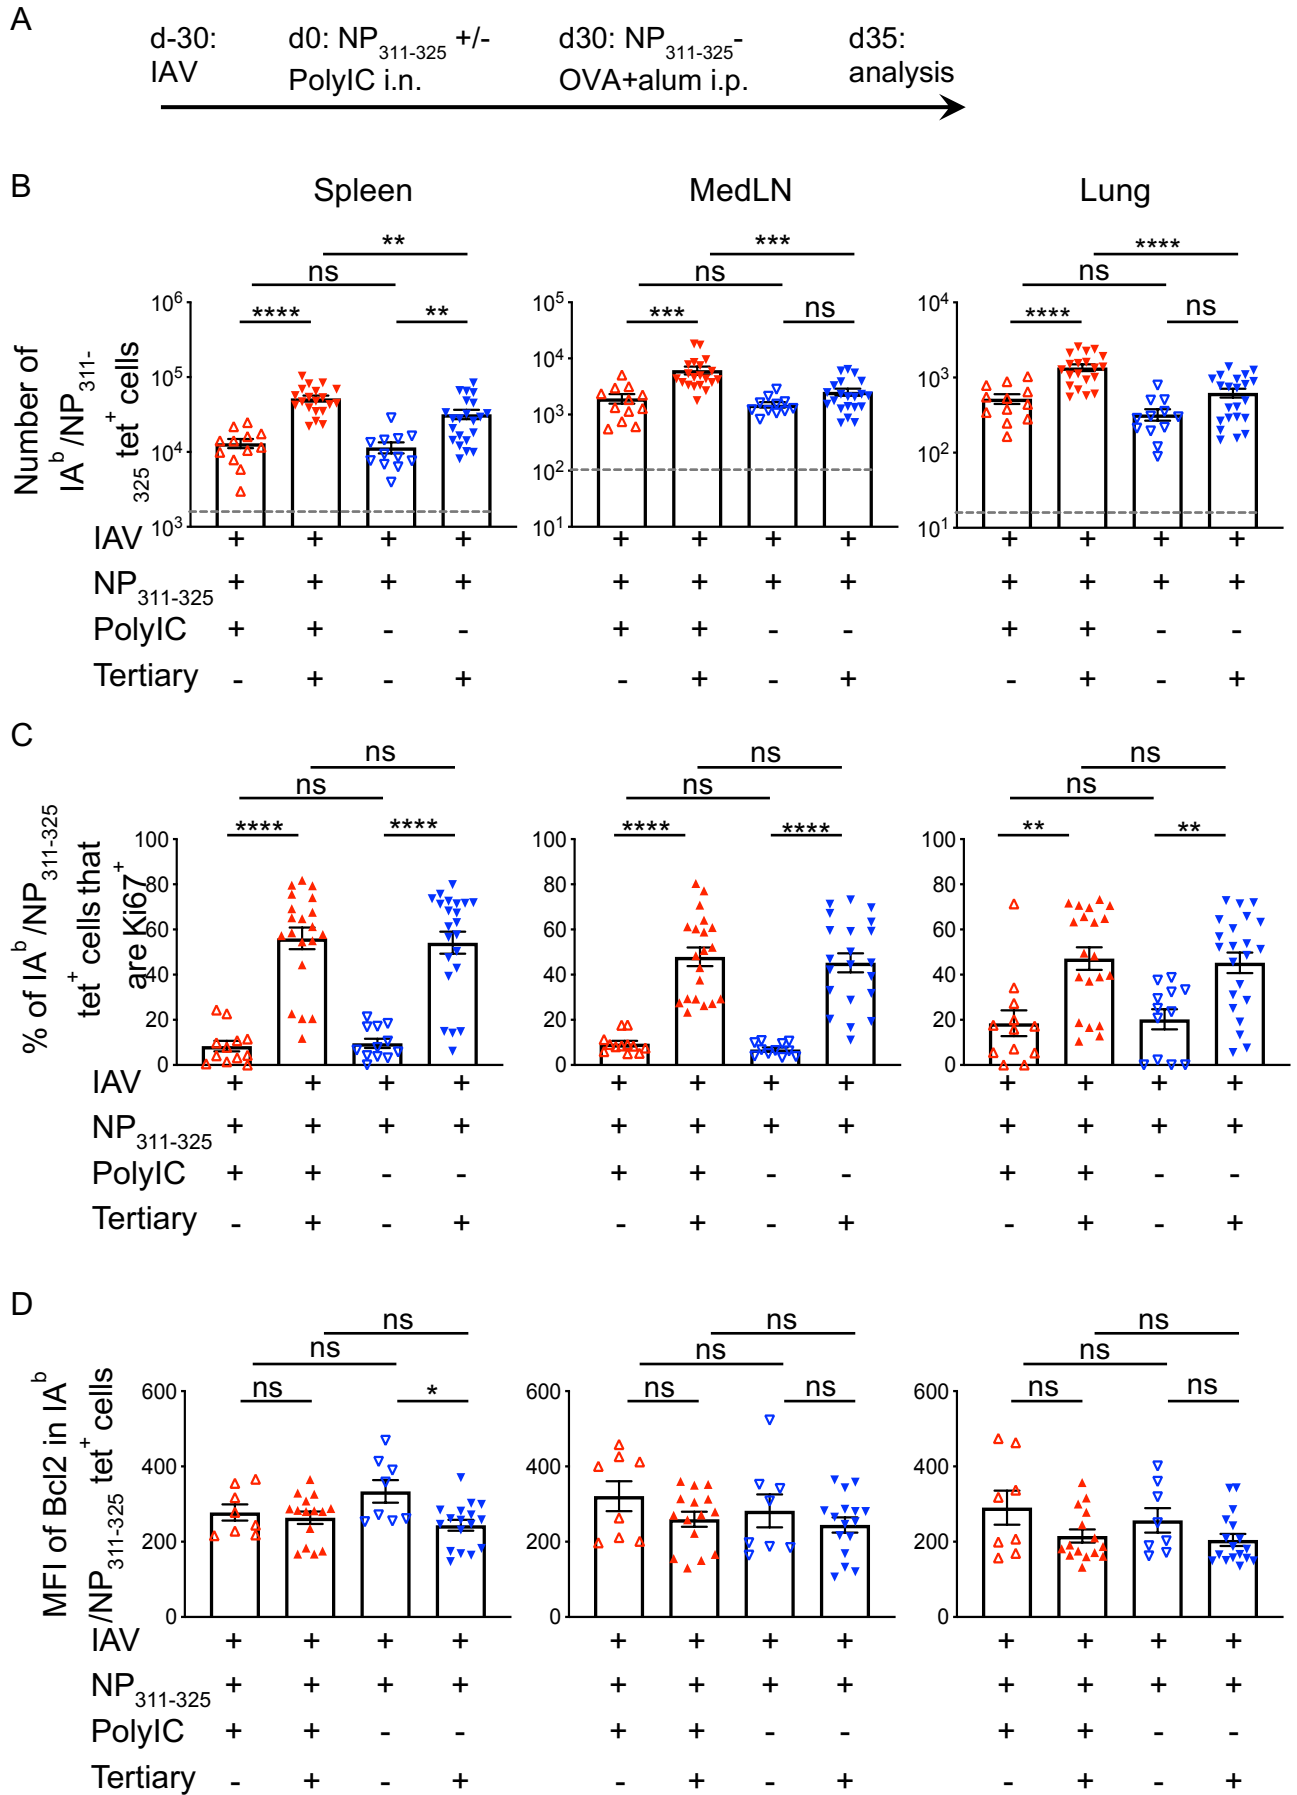

153 **Figure 2: NP<sub>311-325</sub>-specific memory CD4 T cells previously reactivated with peptide**  
154 **without adjuvant fail to accumulate in the lung after tertiary reactivation**

155 C57BL/6 mice were infected with IAV on day -30. On day 0, mice received NP<sub>311-325</sub> +/- PolyIC  
156 and some of these mice were immunised i.p with NP-OVA with alum on day 30 (A). The  
157 numbers of IA<sup>b</sup>/NP<sub>311-325</sub> CD44<sup>hi</sup> CD4 T cells were examined 5 days later in the spleen, MedLN,  
158 and lung (B) and their expression of Ki67 (C) and Bcl2 (D) determined. Each symbol  
159 represents one mouse and error bars are SEM. In B, the grey dashed line represents the  
160 background staining in naïve animals. Data are combined from 4 experiments (4-  
161 8mice/experiment). All statistics calculated using a one-way ANOVA with multiple  
162 comparisons; ns = not significant, \* = <0.05, \*\* = <0.01, \*\*\* = <0.001, \*\*\*\* = <0.0001.

163

164 **Memory CD4 T cells reactivated with tolerogenic signals are not converted to regulatory**  
165 **T cells**

166 Previous studies have shown that activation with antigen alone can lead to tolerance via the  
167 induction of FoxP3-expressing regulatory T cells(Zhang et al., 2013). We found few NP<sub>311-325</sub>-  
168 specific FoxP3<sup>+</sup> cells at any timepoint examined (Figure 3). While there was a slightly  
169 increased percentage of antigen-specific FoxP3<sup>+</sup> cells in the mice exposed to tolerogenic  
170 signals at one time point in the spleen, there were no differences in the number of FoxP3<sup>+</sup>  
171 NP<sub>311-325</sub>-specific cells between the groups. This suggests that Treg conversion does not  
172 explain the poor accumulation of antigen-specific memory CD4 T cells previously exposed to  
173 tolerogenic signals.

174

175

Gray, Figure 3

176  
177  
178  
179  
180  
181

A

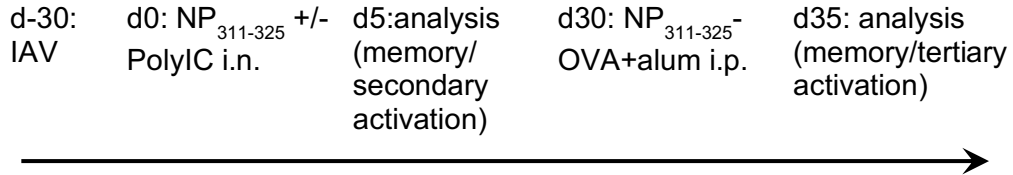

B

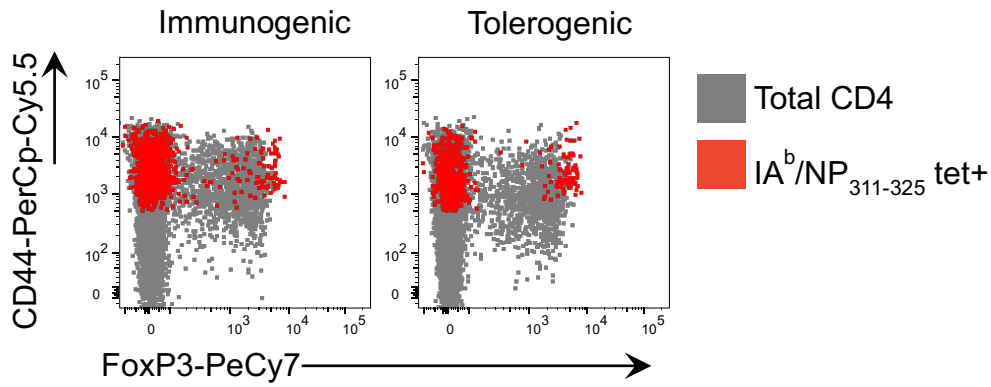

C

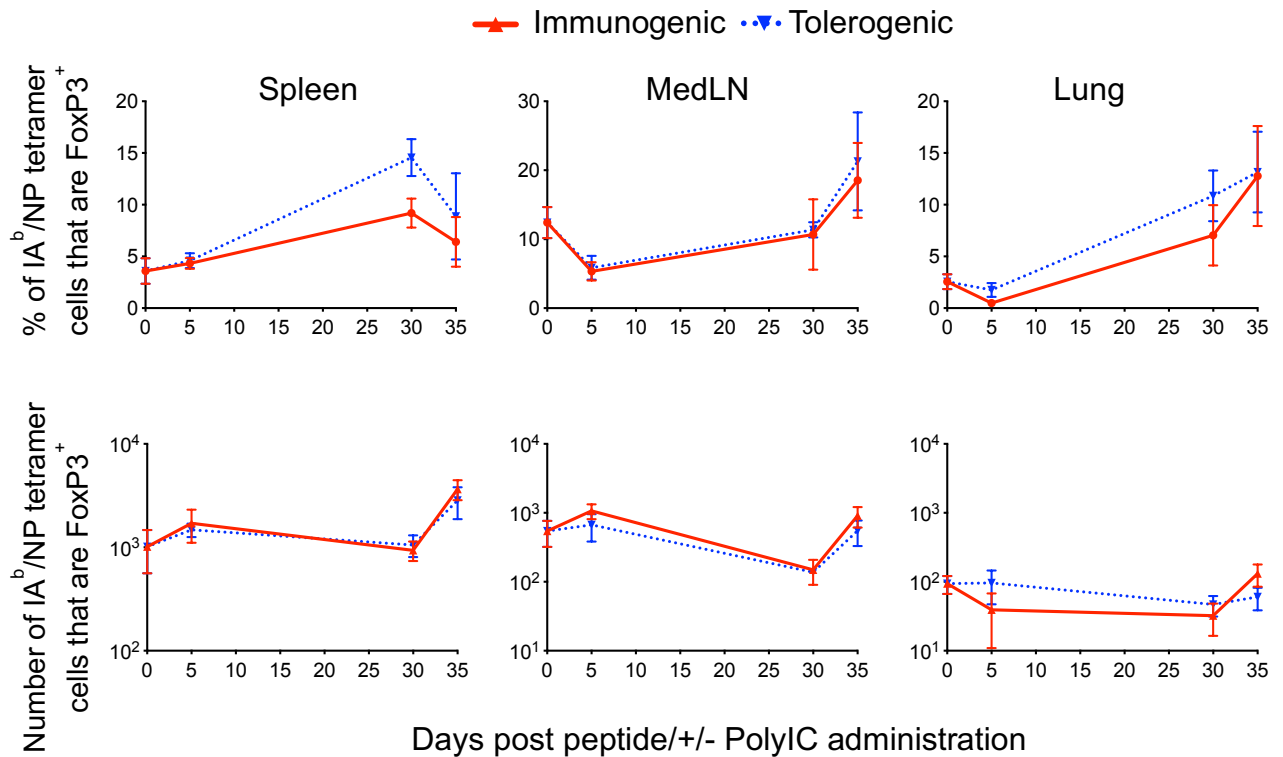

182 **Figure 3: NP<sub>311-325</sub>-specific memory CD4 T cells exposed to soluble antigen in the**  
183 **absence of adjuvant are not converted to Tregs**  
184 *C57BL/6 mice were infected with IAV on day -30. On day 0, mice received NP<sub>311-325</sub> +/- PolyIC*  
185 *i.n. and some of these mice were immunised i.p with NP-OVA and alum on day 30 (A). The*  
186 *expression of FoxP3 by IA<sup>b</sup>/NP<sub>311-325</sub> CD44<sup>hi</sup> CD4 T cells was determined and shown in red*  
187 *and total CD4 T cells in grey in representative FACS plots (B) and the percentages and*  
188 *numbers of FoxP3 by IA<sup>b</sup>/NP<sub>311-325</sub> CD44<sup>hi</sup> CD4 T cells days 0, 5 and 35 shown in (C). The data*  
189 *are combined from 1 experiment/timepoint with 4-5 mice/group/timepoint. Each symbol*  
190 *represents the mean of between 4-5 mice and the error bars are SEM, \*\*\* = <0.001.*

191

192 **Memory CD4 T cells exposed to tolerogenic signals display evidence of mitotic**  
193 **catastrophe following reactivation**

194 Thus far our experiments indicated that memory CD4 T cells activated with tolerogenic signals  
195 can survive in the memory pool but accumulate poorly upon tertiary reactivation. To take an  
196 unbiased approach to investigate this failure, we performed transcriptomics analysis. For this  
197 we required a significant number of memory CD4 T cells that could be easily isolated for  
198 analysis. As identification of antigen-specific CD4 T cells by MHC tetramers requires ligation  
199 of the TCR by MHC molecules and the number of epitope specific cells are limited, we  
200 developed a novel triple transgenic reporter mouse TRACE (T cell Reporter of Activation and  
201 Cell Enumeration). We generated a transgenic animal in which the IL-2 promoter drives  
202 expression of rtTA. These animals were crossed to B6.Cg-Tg(tetO-cre)1Jaw/J mice and  
203 B6.129X1-Gt(ROSA)26SorTm(EYFP+)Cos mice. In these animals, T cells activated through  
204 the TCR when the animals are given doxycycline (Dox) become permanently EYFP+  
205 (Supplementary Figure 4A).

206

207 Feeding of the Dox+ diet for one week was sufficient to induce a small population of EYFP+  
208 cells, even in the absence of immunisation. However, delivery of OVA conjugated to 20µm  
209 polyethylene carboxylate beads in combination with the strong adjuvant combination of anti-

210 CD40 and PolyI:C(Kurche et al., 2010) drove an increased population of EYFP+ CD4 T cells  
211 above background (Supplementary Figure 4B,C). OVA was used for these studies as we  
212 required a protein containing multiple CD4 T cell epitopes which could be obtained free of  
213 contaminating microbial products, which would be present in recombinant IAV proteins.  
214 Moreover, we found that recombinant nucleoprotein had intrinsic adjuvant properties(Macleod  
215 et al., 2013).

216

217 To reactivate the memory CD4 T cells, we returned to systemic i.v. delivery of OVA protein as  
218 this is widely accepted as a consistent tolerogenic route(David et al., 2014, Jenkins and  
219 Schwartz, 1987, Liblau et al., 1996). We found that secondary immunisation with OVA in the  
220 TRACE mice led to anaphylactic shock, likely a consequence of anti-OVA antibodies. To avoid  
221 this, we sorted EYFP+ CD4 T cells at day 8 after immunisation and transferred these cells into  
222 naïve C57BL/6 animals that were injected with OVA or OVA and LPS i.v. after 22 days, 30  
223 days since the cells were first primed. Thirty days following this, the recipient animals were  
224 immunised with OVA+alum and CD4+ EYFP+ cells isolated 5 days later for RNA-seq analysis  
225 (Figure 4A).

226

227 Gene expression from 5 individual mice in each experimental condition were analysed. One  
228 sample from the tolerogenic group was excluded as the number of EYFP+ CD4 T cells  
229 collected was 2.5-10fold higher than any of the other samples, suggesting an abnormal  
230 response or potential contamination during sorting. Of the differently expressed genes  
231 (DEGs), 898 were expressed at lower levels and 667 at higher levels in the tolerogenic group  
232 compared to the immunogenic group (Figure 4B). Analysis of DEGs expressed at higher levels  
233 in the tolerised samples failed to find consistent changes across all four samples. We,  
234 therefore, concentrated on DEGs that were expressed at lower levels in the tolerised samples.  
235 Gene ontology (Panther(Mi et al., 2019)) analysis of the biological processes associated with  
236 these DEGs indicated overrepresentation of gene products involved in 'DNA-dependent DNA

237 replication', 'spindle organisation' and 'cell cycle checkpoints' (Table 1 and Supplementary  
 238 Excel File 1).

239

240 We performed gene set enrichment analysis and found that the DEGs were enriched for genes  
 241 within the GO term, Cell Cycle Checkpoints (Figure 4C); DEGs within this GO term that were  
 242 expressed at lower levels in the tolerogenic samples are displayed as a heatmap (Figure 4D).

243 A number of these molecules play key roles at various stages of the cell cycle and in spindle  
 244 formation and function. These genes include: the essential cyclin, Cdk1(Santamaria et al.,  
 245 2007); Aurkb, a key component of the Chromosome Passenger Complex required for normal  
 246 spindle assemble(Joukov and De Nicolo, 2018); Mad111 (also known as MAD1), a component  
 247 of the spindle-assembly checkpoint(Hardwick and Murray, 1995, Musacchio, 2015); and  
 248 Cdk5rap2 which plays a number of roles in spindle checkpoints(Lizarraga et al., 2010, Zhang  
 249 et al., 2009).

250

251 Table 1: Gene over-representation analysis of DEGs expressed at lower levels in EYFP+ CD4

252 T cells in tolerogenic groups (top 3)

|                                                  | Number<br>of<br>genes | Number<br>of<br>genes<br>within<br>DEGs | Fold<br>enrichment | Raw<br>p<br>value | Adjusted<br>p<br>value (FDR) |
|--------------------------------------------------|-----------------------|-----------------------------------------|--------------------|-------------------|------------------------------|
| DNA-dependent<br>DNA replication<br>(GO:0006261) | 103                   | 13                                      | 3.71               | 1.16E-04          | 3.98E-02                     |
| Spindle organization<br>(GO:0007051)             | 134                   | 15                                      | 3.29               | 1.22E-04          | 4.10E-02                     |
| Cell cycle checkpoint<br>(GO:0000075)            | 152                   | 16                                      | 3.1                | 1.41E-04          | 4.56E-02                     |

253

254 Dysfunction of the spindle checkpoint is linked to death by mitotic catastrophe, a form of cell  
 255 death that occurs when cells are unable to complete mitosis(Nitta et al., 2004, Shang et al.,  
 256 2010). As the percentages of CD4 T cells that were Ki67+ after tertiary activation were  
 257 equivalent regardless of whether or not they had been activated with immunogenic or  
 258 tolerogenic signals (Figure 2C), these data suggests that memory CD4 T cells activated with  
 259 tolerogenic signals can enter the cell cycle but fail to complete cell division following tertiary

260 reactivation. To investigate this, we examined the proportion of reactivated memory antigen-  
261 specific T cells in mitosis reasoning that more CD4 T cells would be found in mitosis in  
262 reactivated cells previously exposed to tolerogenic signals as they would be 'stuck' in mitosis.

263

264 The percentages of re-activated antigen-specific T cells in mitosis were determined by  
265 expression of phosphorylated (p)Histone 3, present only during mitosis(Hans and Dimitrov,  
266 2001). We focused on cells with increased forward scatter as cells increase in size during cell  
267 division(Bohmer et al., 2011). CD4 T cells were examined 4 days after tertiary reactivation of  
268 mice first immunised with NP<sub>311-325</sub> and LPS, then reactivated with NP<sub>311-325</sub> delivered with or  
269 without LPS and finally reactivated with NP-OVA+alum (Figure 4E). Very few antigen-specific  
270 T cells were positive for p-H3, but consistently more CD4 T cells were p-H3 positive in mice  
271 previously immunised with NP<sub>311-325</sub> delivered without, than with, LPS (Figure 4E). This  
272 indicates that the cells in mice that received tolerogenic signals were more likely to be mitosis,  
273 suggestive of a failure to complete cell division.

274

Gray, Figure 4

275  
276

**A**

Day -30: OVA-beads +PolyIC+ anti-CD40 s.c.      Day -22: sort EYFP+ CD44<sup>hi</sup> CD4+ T cells and transfer i.v. into C57BL/6 mice      Day 0 recipients immunied with OVA i.v. +/-LPS      Day 30: OVA+alum i.p.      Day 35: Sort EYFP+ CD44<sup>hi</sup> CD4+ T cells for transcriptomics analysis

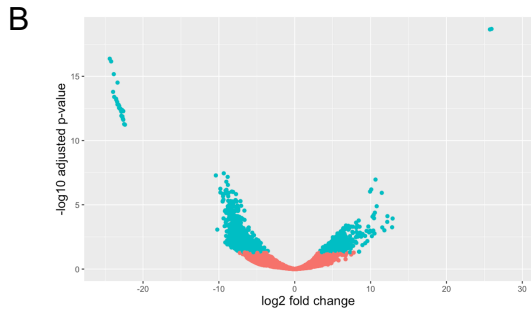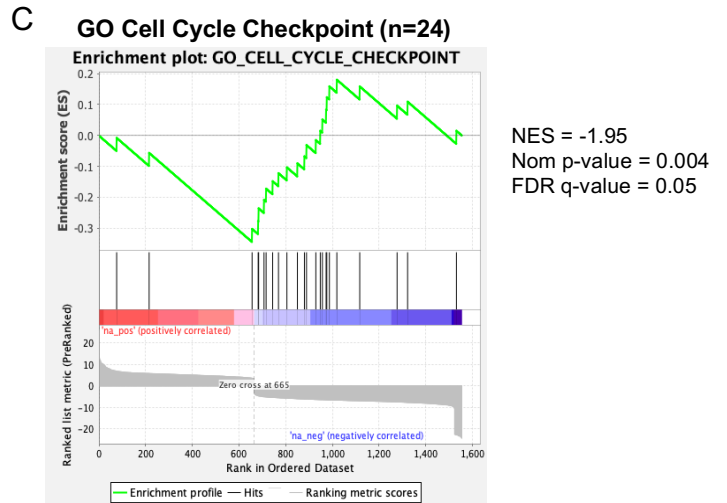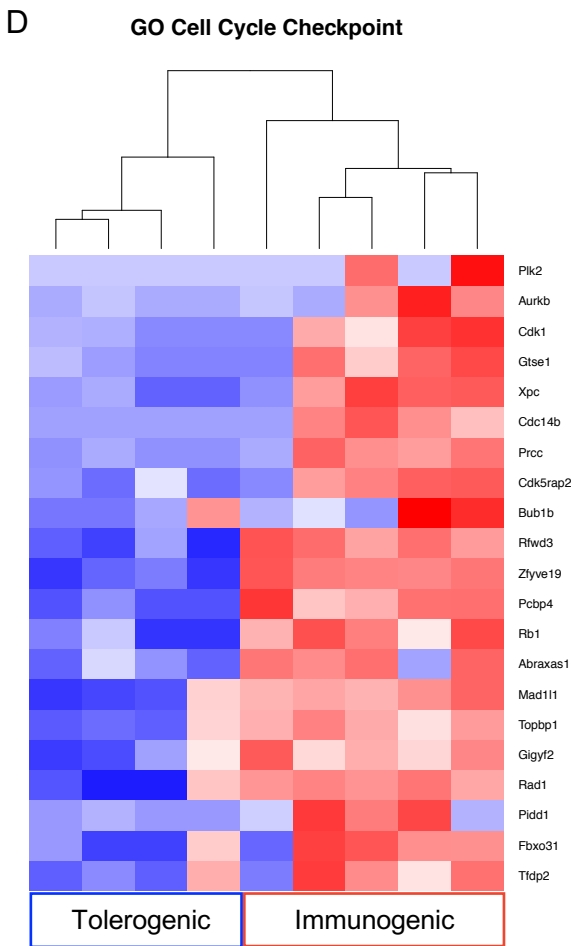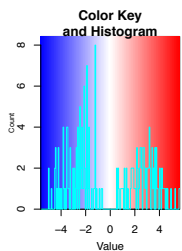

**E**

d-30: NP<sub>311-325</sub> +LPS i.v.      d0: NP<sub>311-325</sub> +/- LPS i.v.      d30: NP<sub>311-325</sub><sup>-</sup> OVA+ alum i.p.      d34: analysis

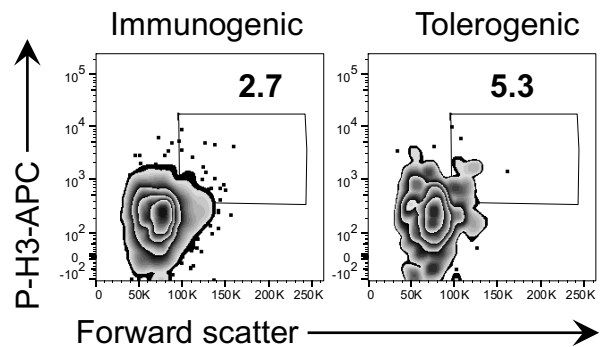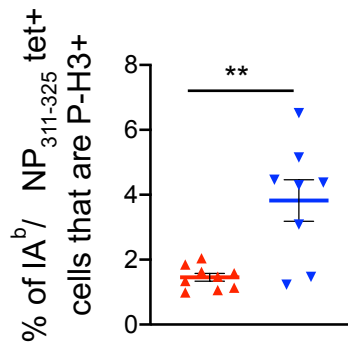

|                       |   |   |
|-----------------------|---|---|
| NP <sub>311-325</sub> | + | + |
| +PolyIC               |   |   |
| NP <sub>311-325</sub> | - | + |
| PolyIC                | + | - |
| Recall                | + | + |



277 **Figure 4: Transcriptomics and cell cycle analysis indicates that memory CD4 T cells**  
278 **exposed to tolerising signals undergo mitotic catastrophe following further**  
279 **reactivation in vivo**  
280 *FACS sorted EYFP+ CD4 T cells from TRACE mice immunized with OVA+anti-CD40 and*  
281 *PolyIC were transferred into naïve C57BL/6 mice that were then immunised with OVA +/- LPS*  
282 *then re-immunised with OVA+alum i.p. 30 days later (A). EYFP+ CD4 T cells were FACS*  
283 *sorted after a further 5 days and RNA isolated for transcriptomic analysis. The DEGs are*  
284 *displayed in a volcano plot (B). GSEA and heatmap show expression of DEGs contained*  
285 *within the GO term 'Cell Cycle Checkpoints' (GO: 0000075) (C). DEGs within the GO term*  
286 *and expressed at lower levels in the tolerogenic samples are displayed in a heatmap (D).*  
287 *C57BL/6 mice immunised with NP<sub>311-325</sub> and LPS were injected with NP<sub>311-325</sub> +/- LPS 30 days*  
288 *later and finally immunised after a further 30 days with NP-OVA+alum. 5 days later the*  
289 *percentages of forward scatter high IA<sup>b</sup>/NP<sub>311-325</sub> tetramer+ cells that expressed*  
290 *phosphorylated Histone3 were examined (E). In (E) cells are gated as in supplementary Figure*  
291 *1 and plots are concatenated from 4 mice per group. Data are combined from 2 experiment*  
292 *with 4-5 mice/group, error bars are SEM. Statistical analysis in B calculated by a T-test, \*\* =*  
293 *<0.01.*

294

295 Mitotic catastrophe often occurs in cells with DNA damage(Vakifahmetoglu et al., 2008). We,  
296 therefore, examined whether any DEGs were enriched in genes involved in GO term DNA  
297 repair. This was indeed the case (Figure 5A); the DEGs expressed at lower levels in the  
298 tolerised samples are shown as a heatmap (Figure 5B). The GSEA of the DEGs expressed at  
299 lower levels in the tolerogenic samples indicates that multiple genes contribute to this  
300 enrichment. These data suggest that tolerised memory CD4 T cells display poor repair of their  
301 DNA during reactivation-induced DNA synthesis and that this is a consequence of reduced  
302 expression of a number of different genes. This, coupled with the low expression of cell cycle  
303 checkpoint proteins, likely compromises their ability to commit to cell division.

304

306 A

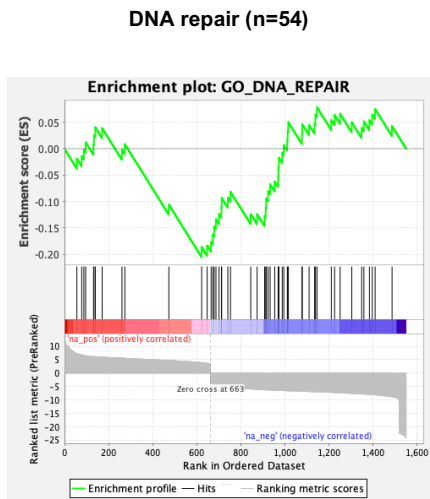

NES = -1.78  
 Nom p-value = 0.012  
 FDR q-value = 0.09

B

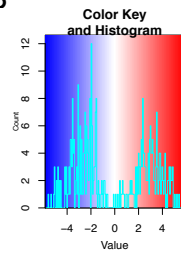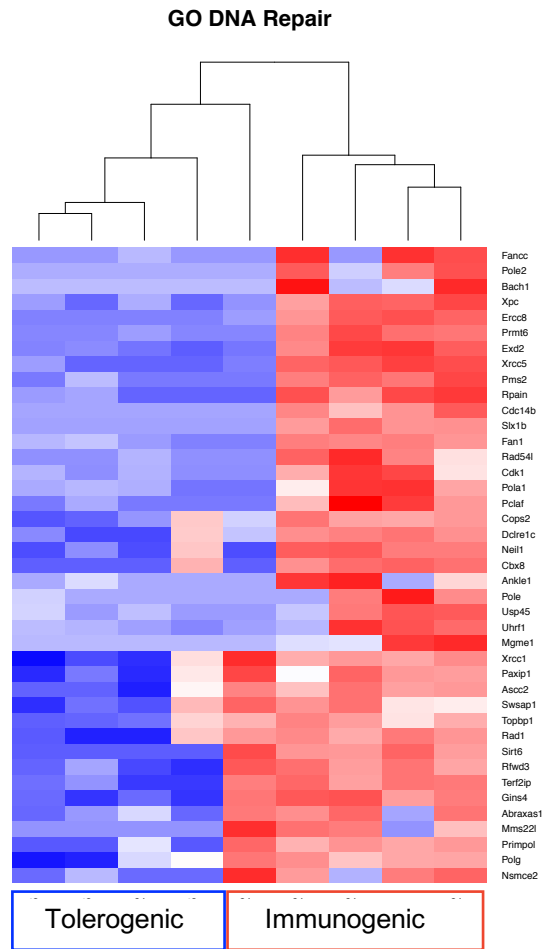

307 **Figure 5: Transcriptomics analysis indicates that memory CD4 T cells exposed to**  
308 **tolerising signal have reduced expression of DNA repair enzymes**

309 *FACS sorted EYFP+ CD4 T cells from TRACE mice immunized with OVA+anti-CD40 and*  
310 *PolyIC were transferred into naïve C57BL/6 mice that were then immunised with OVA +/- LPS*  
311 *then re-immunised with OVA+alum i.p. 30 days later as in Figure 4. EYFP+ CD4 T cells were*  
312 *isolated by FACS after a further 5 days and RNA isolated for transcriptomic analysis. GSEA*  
313 *shows significant enrichment of the genes involved within the GO term ‘DNA repair’ (GO:*  
314 *0006281) (A) and the DEGs expressed at lower levels in the tolerogenic samples are*  
315 *displayed in a heatmap (B).*

316

317 **Memory CD4 T cells exposed to tolerogenic signals continue to produce cytokine but**  
318 **fail to provide accelerated help to primary responding B cells**

319 Our data indicate that memory CD4 T cells reactivated with tolerogenic signals have impaired  
320 proliferative responses. We also wanted to determine whether these cells were impaired in  
321 other ways. To investigate this, we used the IAV infection model to generate sufficient cells in  
322 multiple organs to examine *ex vivo* cytokine production; cytokine responses are limited in  
323 antigen/adjuvant models(MacLeod et al., 2008).

324

325 Thirty days after mice were infected with IAV, they were injected with immunogenic or  
326 tolerogenic NP<sub>311-325</sub> i.n. and then rested for 30 days (Figure 6A). Bone marrow dendritic cells  
327 loaded with NP<sub>311-325</sub> were used to examine the *ex vivo* cytokine potential of the memory CD4  
328 T cells and activated CD4 T cells from mice given a tertiary immunisation with NP<sub>311-325</sub>-OVA  
329 and alum delivered i.p. (Supplementary Figure 5).

330

331 The numbers of IFN- $\gamma$ , TNF or IL-2 producing antigen-specific memory CD4 T cells were  
332 equivalent in mice exposed to immunogenic or tolerogenic NP<sub>311-325</sub> peptide 35 days  
333 previously (Figure 6B). Five days after reactivation with NP-OVA+alum, there was an increase  
334 of TNF and IL-2 producing cells in the spleen and the MedLN in mice previously exposed to

335 NP<sub>311-325</sub> and PolyIC. In contrast, there was no increase in the number of cytokine producing  
336 cells in mice previously exposed to tolerogenic NP<sub>311-325</sub>. In neither group did we see an  
337 increase in IFN- $\gamma$  producing CD4 T cells. Together, these data suggest that, while exposure  
338 to tolerogenic signals affected accumulation of T cells, it did not prevent their ability to produce  
339 cytokines.

340

341 To investigate the functional responses of the T cells further, we examined their ability to  
342 provide accelerated help to primary responding OVA-specific B cells(David et al., 2014,  
343 MacLeod et al., 2011). We measured the levels of class-switched, OVA-specific antibody 5  
344 days after the tertiary reactivation. As expected, primary responding mice had very little class-  
345 switched OVA-specific antibody and IAV-infected mice previously exposed to immunogenic  
346 signals had clearly detectable levels of OVA-specific immunoglobulin(MacLeod et al., 2011).  
347 In contrast, IAV-infected mice that had previously received tolerogenic signals failed to  
348 produce these antibodies at levels above primary immunised animals, demonstrating an  
349 impaired functional response (Figure 6C).

350

Gray, Figure 6

351

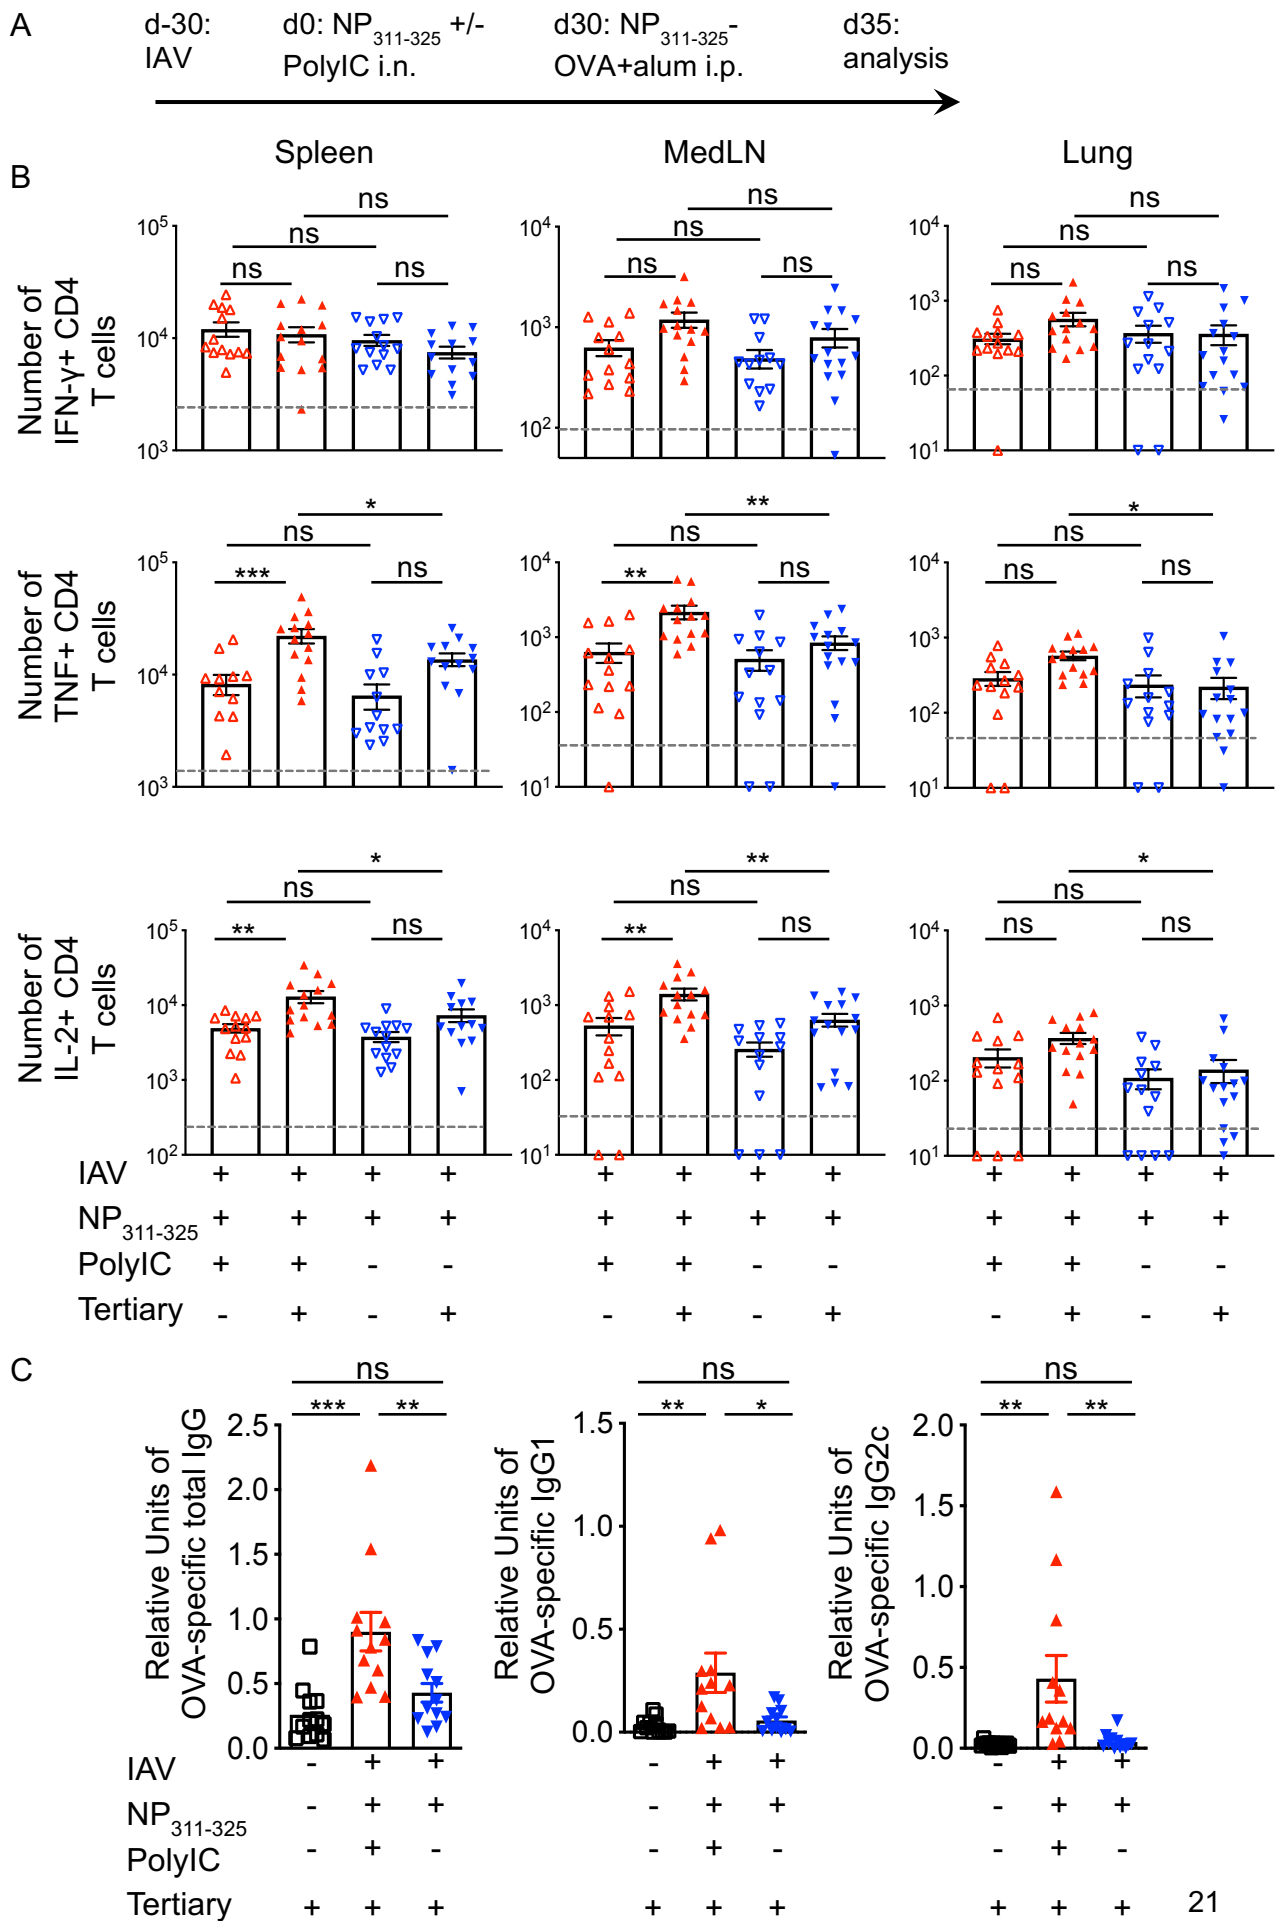

352 **Figure 6: Activation of CD4 T cells with peptide in the absence of adjuvant does not**  
353 **affect CD4 T cell cytokine production but does prevent them providing accelerated help**  
354 **to B cells**

355 *C57BL/6 mice were infected with IAV on day -30. On day 0, mice received NP<sub>311-325</sub> +/- PolyIC*  
356 *and some of these mice were immunised i.p with NP-OVA with alum on day 30 (A). On day*  
357 *35, cells from the spleen, MedLN and lung were co-cultured with bmDCs loaded with NP<sub>311-</sub>*  
358 *<sub>325</sub> for 6 hours in the presence of Golgi Plug and the number of IFN- $\gamma$ , TNF and IL-2 producing*  
359 *CD44<sup>hi</sup> CD4+ T cells examined (B). The levels of IgG, IgG1 and IgG2c anti-OVA antibodies in*  
360 *the serum was determined on day 5 (C). Each symbol represents one mouse and error bars*  
361 *are SEM. In B the grey dashed line represents the background staining in naïve animals. Data*  
362 *in B are combined from 2-3 experiments (3-5mice/experiment). Data in C are combined from*  
363 *3 experiments with 4 mice/experiment. All statistics calculated using a one-way ANOVA with*  
364 *multiple comparisons; ns = not significant, \* = <0.05, \*\* = <0.01, \*\*\* = <0.001, \*\*\*\* = <0.0001.*

365

366 **Memory CD4 T cells exposed to tolerogenic signals expand following reactivation with**  
367 **influenza virus**

368 Finally, we wanted to test whether the failure of CD4 T cells exposed to tolerogenic signals to  
369 accumulate could be rescued by reactivation with a more inflammatory stimulus. We therefore  
370 challenged IAV infected mice given immunogenic or tolerogenic signals with an heterosubtypic  
371 form of IAV, X31 (Figure 7A).

372

373 Five days following re-infection, we found significant increases in the numbers of antigen-  
374 specific CD4 T cells in the lungs and MedLN of mice regardless of their immunisation history  
375 (Figure 7B). This expansion was less clear in the spleen regardless of previous immunisation.  
376 In all organs, the majority of the antigen-specific CD4 T cells were Ki67 positive indicating a  
377 more robust response following IAV infection compared to immunisation (Figure 7C versus  
378 Figure 2C).

379

380  
381

Gray, Figure 7

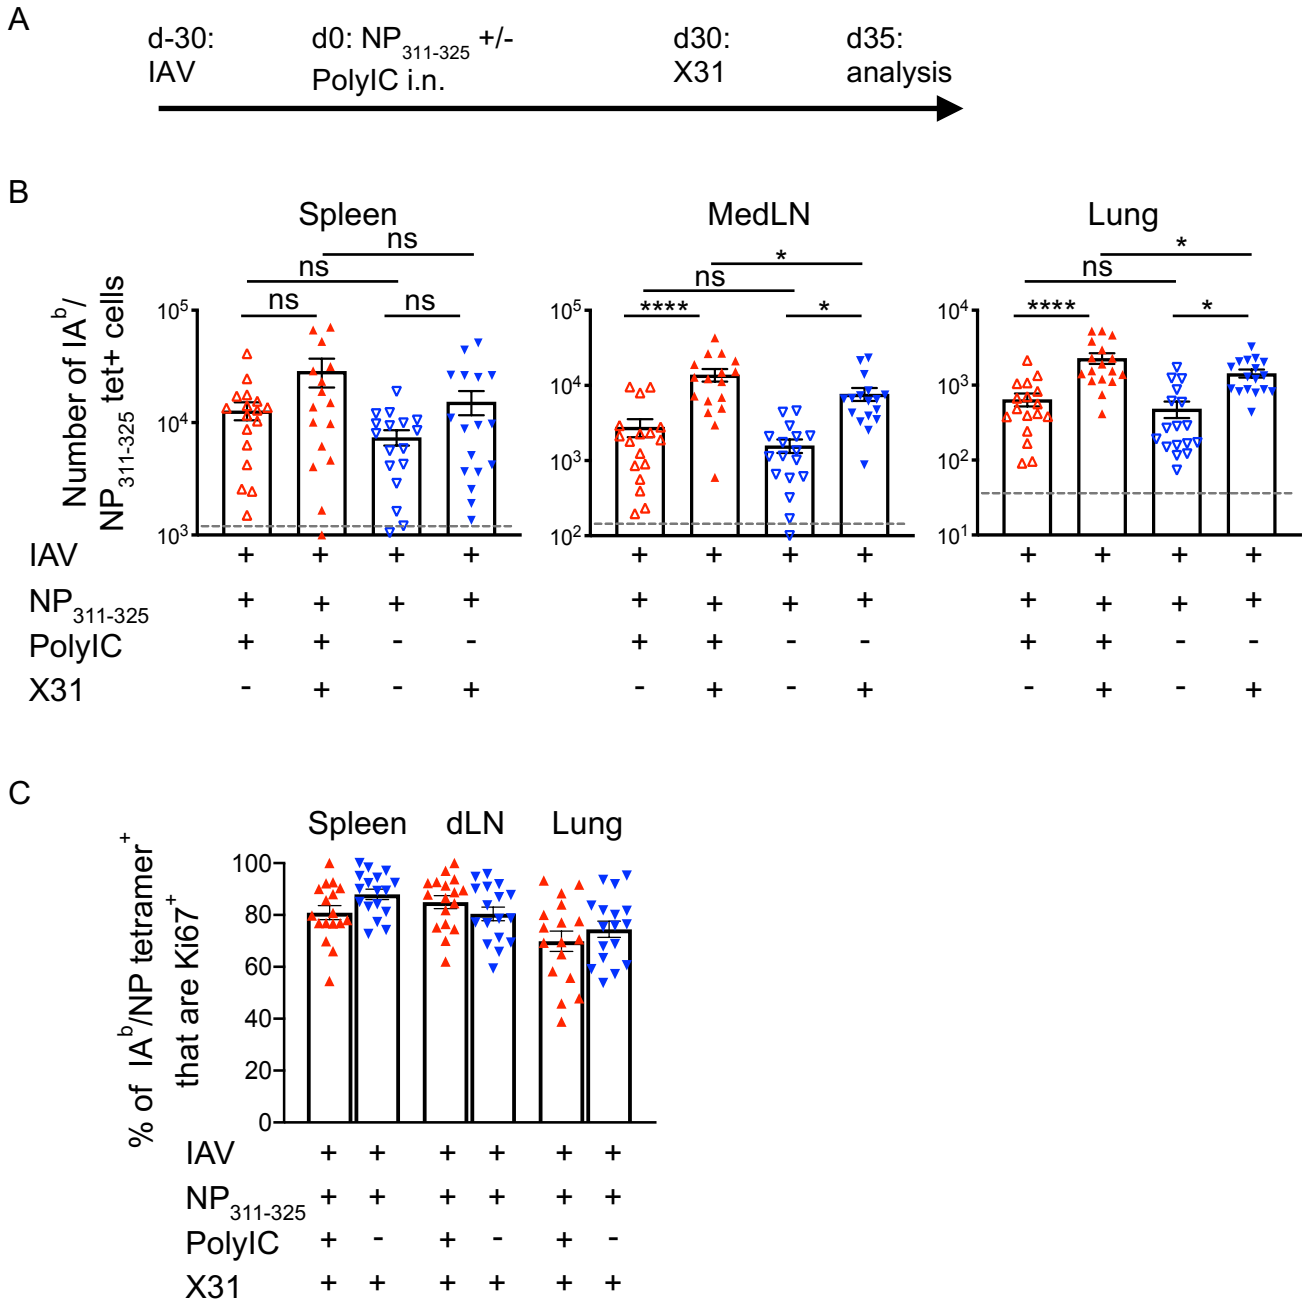

382 **Figure 7: CD4 T cells exposed to peptide in the absence of adjuvant expand following**  
383 **re-infection with IAV**  
384 C57BL/6 mice were infected with IAV on day -30. On day 0, mice received NP<sub>311-325</sub> +/- PolyIC  
385 i.n. and some of these mice were infected with 100PFU of X31 i.n. 30 days after this (A). The  
386 numbers of IA<sup>b</sup>/NP<sub>311-325</sub> CD44<sup>hi</sup> CD4 T cells were examined 5 days later in the spleen, MedLN,  
387 and lung (B) and their expression of Ki67 determined (C). In B and C, each symbol represents  
388 one mouse and error bars are SEM. In A, the grey dashed line represents the background  
389 staining in naïve animals. Data are combined from 3 experiments (5-6 mice/experiment). All  
390 statistics calculated using a one-way ANOVA with multiple comparisons; ns = not significant,  
391 \* = <0.05, \*\* = <0.01, \*\*\* = <0.001, \*\*\*\* = <0.0001.

392

## 393 Discussion

394

395 Memory CD4 T cells respond to low doses of antigen and costimulatory signals suggesting  
396 they will be refractory to tolerance induction(Blair et al., 2011, Holzer et al., 2003, London et  
397 al., 2000, MacLeod et al., 2006). This presents significant hurdles for therapies that aim to  
398 induce antigen-specific T cell tolerance(MacLeod and Anderton, 2015, Pearson et al., 2017,  
399 Ten Brinke et al., 2019).

400

401 Our previous(David et al., 2014) and current data demonstrate that some but not all functions  
402 of memory CD4 T cells are altered following the exposure of memory CD4 T cells to antigen  
403 delivered in the absence of adjuvant. Our findings demonstrate that tolerance induction in  
404 these cells is both subtle and complex. This contrasts with investigations of tolerance induction  
405 in naïve CD4 T cells that consistently show silencing of multiple T cell functions(Greenwald et  
406 al., 2005, Liu et al., 2019, Miller et al., 2007, Nurieva et al., 2006, Nurieva et al., 2011).

407

408 Consistently in our own and others research, memory CD4 T cells reactivated with antigen  
409 alone fail to accumulate following tertiary activation with antigen and adjuvant(David et al.,



410 2014, Mackenzie et al., 2014). Our analysis of cell proliferation and survival signals suggest  
411 that this is not a consequence of reduced entry into the cell cycle nor low expression of anti-  
412 apoptosis molecules. Instead, our data indicate that memory CD4 T cells reactivated following  
413 exposure to antigen fail to complete mitosis, a characteristic associated with the phenomenon  
414 of mitotic catastrophe.

415

416 Mitotic catastrophe has mainly been studied in tumour cells treated with ionising radiation or  
417 drugs that cause DNA damage(Kimura et al., 2013, Maskey et al., 2013, Mc Gee, 2015,  
418 Vakifahmetoglu et al., 2008). Our transcriptomic data indicate that reactivated memory CD4 T  
419 cells previously exposed to tolerogenic signals have reduced expression of molecules  
420 involved in sensing and repairing DNA damage and in the control of various stages of the cell  
421 cycle. Our data suggest, therefore, a novel form of cell death for memory CD4 T cells.

422

423 In contrast to the poor accumulation of memory CD4 T cells exposed to tolerogenic signals,  
424 this did not shut down cytokine production. We found only small increases in cytokine-  
425 producing CD4 T cells following reactivation regardless of T cell activation history. If these  
426 cells are not undergoing cell division, they would not be at risk of death via mitotic catastrophe.  
427 These data suggest that non-cytokine producing memory CD4 T cells are more likely to  
428 proliferate than those committed to cytokine production. This agrees with the general concepts  
429 within the Tcentral/Teffector memory cell classification and with findings from ourselves and  
430 others that cells either making IFN- $\gamma$ , or that are CD62L<sup>lo</sup>, proliferate poorly on  
431 reactivation(Dutta et al., 2013, MacLeod et al., 2008, Thomas et al., 2010).

432

433 We did find that memory CD4 T cells previously exposed to tolerogenic signals were unable  
434 to provide accelerated help for primary responding B cells, suggesting cell proliferation may  
435 be required for this functional response. This contrasts with our previous study in which  
436 memory cells exposed to tolerogenic signals could help primary responding B cells produce  
437 class switched antibody(David et al., 2014). There are multiple differences in experimental

438 procedure between our previous study and the experiments here including the antigen (3K  
439 peptide versus NP<sub>311-325</sub>) form of priming (antigen versus infection) and route of tolerance  
440 induction (intravenous versus intranasal) that could explain this difference. Regardless, in our  
441 studies and similar research from others, memory CD4 T cells reactivated with antigen  
442 delivered without adjuvant accumulate poorly following a subsequent immunisation (David et  
443 al., 2014, Mackenzie et al., 2014). This suggests that consistently and, regardless of  
444 specificity, priming, memory cell location, and route of injection of tolerogenic signals, memory  
445 CD4 T cells reactivated with antigen in the absence of adjuvant proliferate poorly following  
446 reactivation with antigen and adjuvant.

447

448 Interestingly, we found that this poor accumulation could be rescued by re-infection with IAV,  
449 a much more potent challenge to the host than immunisation. These data suggest that while  
450 the responses of memory CD4 T cells can be moderated by exposure to tolerogenic signals,  
451 these cells may not be permanently silenced. An alternative explanation is that a portion of  
452 the memory CD4 T cells are not reactivated by antigen immunisations and therefore remain  
453 blind to the tolerogenic signals and free to respond to the infection. Teasing apart these two  
454 possibilities will require detailed understanding of the micro-location of memory CD4 T cells  
455 within peripheral and lymphoid organs and which antigen presenting cells reactivate memory  
456 CD4 T cells following immunisation and infection. A deeper understanding of these factors will  
457 be critical to address the most effective methods of antigen-specific tolerance strategies. Our  
458 data, moreover, demonstrate the importance of analysing multiple phenotypic and functional  
459 parameters in trials of antigen-specific therapy (Pearson et al., 2017, Ten Brinke et al., 2019).

460

## 461 **Materials and Methods**

462

### 463 **Animals**

464 To generate mice in which rtTA reports IL-2 expression we used recombineering to extract the  
465 upstream 8.389kb section of the IL-2 promoter from a Bacterial Artificial Chromosome (BAC)

466 RP24208L3 (BAC resource at Children's Hospital Oakland Research Institute, Buffalo, New  
467 York). This was subcloned into a plasmid containing the human CD2 locus control region and  
468 linked to the rtTA sequence. The transgene, cut and purified from the construct backbone,  
469 was used to create transgenic mice at the Transgenic mouse facility at National Jewish Health  
470 in Jackson Lab C57BL/6 animals. Two founder pups were identified by PCR but only one was  
471 fertile. Progeny of this animal were bred with B6.Cg- Tg(tetO-cre)1Jaw/J (006234) and  
472 B6.129X1-Gt(ROSA)26Sor<sup>tm1(EYFP+)</sup>Cos (006148) both from Jackson Laboratories. 10  
473 week old female C57BL/6 mice were purchased from Envigo (UK). TRACE and C57BL/6 mice  
474 were maintained at the University of Glasgow under standard animal husbandry conditions in  
475 accordance with UK home office regulations (Project License P2F28B003) and approved by  
476 the local ethics committee.

477

#### 478 **Immunisations and infections**

479 TRACE mice were given Dox+ chow (Envigo) for a total of 7 days starting two days prior to  
480 immunisation with 40µg of ovalbumin (OVA) protein (Worthington) conjugated to 20µm  
481 polyethylene carboxylate beads (Polysciences Inc.) with 20µg of polyinosinic:polycytidinic acid  
482 (InvivoGen) and 20µg of anti-CD40 (BioXcell) s.c in the scruff. Recipients of TRACE EYFP+  
483 T cells were given 40µg of OVA with/out 10µg lipopolysaccharide i.v. in 100µl of PBS. NP<sub>311-325</sub>  
484 was conjugated to OVA using Imject Maleimide-activated OVA according to the  
485 manufacturer's instruction (ThermoFisher) and mice immunised with 1µg NP<sub>311-325</sub>-OVA  
486 delivered i.p with 0.1mg alum. For mitosis analysis, C57BL/6 mice were immunised with 20µg  
487 NP<sub>311-325</sub> peptide (IDT) with 10µg of LPS i.v. After 30 days, they were re-immunised with 20µg  
488 NP<sub>311-325</sub> peptide with/out 10µg LPS followed 30 days later by i.p. immunisation with 5µg NP-  
489 OVA with 0.1mg of alum i.p. For IAV studies, C57BL/6 mice were briefly anaesthetised using  
490 inhaled isoflurane and infected with 200-300 plaque forming units of IAV strain WSN in 20µl  
491 of PBS intranasally (i.n.). IAV was prepared and titered in MDCK cells. Infected mice were  
492 rechallenged with 100PFU of X31 (kindly provided by Prof James Stewart, University of

493 Liverpool). Infected mice were weighed daily. Any animals that lost more than 20% of their  
494 starting weight were humanely euthanised.

495

#### 496 **FACS sorting and cell transfers**

497 TRACE mice were euthanised 8 days post-immunisation and single cell suspensions were  
498 prepared. Lymphoid organs, including spleen, mediastinal, axillary, brachial and mesenteric  
499 lymph nodes, from individual mice were pooled and pre-enriched for CD4 T cells using  
500 EasySep™ Mouse T Cell Isolation Kit (Stemcell Technologies). Live, single, EYFP+ CD4 T  
501 cells negative for MHCII, B220, CD8 and F4/80 were sorted on a BD FACS Aria. Sorted cells  
502 were washed in PBS and 100,000 cells transferred i.v. into naïve C57BL/6 mice.

#### 503 **Tissue preparation**

504 Mice were euthanized either by cervical dislocation or with a rising concentration of carbon  
505 dioxide and perfused with PBS-5mM EDTA in experiments examining lungs. Spleen and  
506 mediastinal lymph nodes were processed by mechanical disruption. Single cell suspensions  
507 of lungs were prepared by digestion with 1mg/ml collagenase and DNase (Sigma) for 40  
508 minutes at 37°C. Red blood cells were lysed from spleen and lungs using lysis buffer  
509 (ThermoFisher).

510

#### 511 **Flow cytometry**

512 Single cell suspension were stained with PE-labeled IA<sup>b</sup>/NP<sub>311-325</sub> (NIH tetramer core) at 37°C,  
513 5% CO<sub>2</sub> for 2 hours in complete RPMI (RPMI with 10% foetal calf serum, 100µg/ml penicillin-  
514 streptomycin and 2mM L-glutamine) containing Fc block (24G2). Surface antibodies were  
515 added and the cells incubated for a further 20minutes at 4°C. Antibodies used were: anti-CD4  
516 BUV805 (BD Biosciences; clone: RM4-5) or CD4 APC-Alexa Fluor 780 (eBioscience; RM4-  
517 5), anti-CD44 BUV395 (BD Biosciences; clone: IM7), anti-CXCR5 BV785 (BioLegend;  
518 clone:L138D7), anti-PD-1 BV711 (BioLegend: 29F.1A12) and 'dump' antibodies: B220 (RA3-

519 6B2), anti-CD8 (53-6.7) and MHC II (M5114) all on eFluor-450 (eBioscience). Cells were  
520 stained with a fixable viability dye eFluor 506 (eBioscience). In some cases, cells were then  
521 fixed with FoxP3 Transcription Factor Fixative kit (Thermofisher UK) and stained with anti-  
522 FoxP3 PeCy7 (eBioscience; FJK-16S), anti-Bcl2 FITC (Biolegend; Blc/10C4), anti-Ki67  
523 BV605 (Biolegend; 16A8). Phosphorylated H3 was detected in cells fixed with 2%PFA/0.5%  
524 saponin using Alexa647-labelled anti-Histone H3 (pS28) (HTA28). Cells were acquired on a  
525 BD LSR or Fortessa and analysed using FlowJo (version 10 Treestar).

526

### 527 **T cell cytokine analysis**

528 Bone marrow derived dendritic cells were cultured as described(Inaba et al., 1992) in complete  
529 RPMI supplemented with X-63 supernatant for 7 days. A single cell suspension was incubated  
530 with 10 $\mu$ g/ml NP<sub>311-325</sub> peptide for 2 hours prior to co-culture with lungs, spleen or lymph node  
531 cells in complete RMPI at a ratio of approximately 10 T cells to 1 DC in the presence of Golgi  
532 Plug (BD Bioscience). Co-cultures were incubated at 37°C, 5% CO<sub>2</sub> for 6 hours. Cells were  
533 incubated with Fc block and surface stained with anti-CD4 BUV805 (BD Biosciences; clone:  
534 RM4-5) or CD4 APC-Alexa Fluor 780 (eBioscience; RM4-5), anti-CD44 BUV395 (BD  
535 Biosciences; clone: IM7) and 'dump' antibodies: B220 (clone: RA3-6B2), CD8 (53-6.7) and  
536 MHC II (clone: M5114) all on eFluor-450 (eBioscience). Cells were fixed with cytofix/cytoperm  
537 (BD Bioscience) for 20 minutes at 4°C and stained in permwash buffer with anti-cytokine  
538 antibodies for one hour at room temperature (anti-IFN- $\gamma$  PE (XMG1.2;), anti-TNF Alexa-Fluor-  
539 488 (MP6-XT22) anti-IL-2 APC (JES6-5H4) all from eBioscience.

540

### 541 **RNA isolation for RNA-seq**

542 CD4<sup>+</sup> EYFP<sup>+</sup> cells from the spleen, mediastinal, axillary, brachial and mesenteric lymph  
543 nodes of TRACE cell recipients were FACS sorted as above and cell pellets were stored at -  
544 20°C prior to RNA extraction. RNA was extracted and purified from single cell suspensions  
545 using RNeasy Micro Kit (Qiagen) according to manufacturer's instructions.

546 **RNA analysis**

547 Sequencing and library prep were conducted by LCSciences Ltd. Total RNA was extracted  
548 using Trizol reagent (Invitrogen, CA, USA). Total RNA quantity and purity were analysed using  
549 a Bioanalyzer 2100 and RNA 6000 Nano LabChip Kit (Agilent, CA, USA), all samples had RIN  
550 numbers >7.0. Approximately 10µg of total RNA was subjected to isolate Poly (A) mRNA with  
551 poly-T oligoattached magnetic beads (Invitrogen). Following purification, the poly(A)- or  
552 poly(A)+ RNA fractions were fragmented using divalent cations under elevated temperature.  
553 The cleaved RNA fragments were reverse-transcribed to create the final cDNA library in  
554 accordance with the protocol for the mRNA-Seq sample preparation kit (Illumina, San Diego,  
555 USA). The average insert size for the paired-end libraries was 300 bp (±50 bp). Paired-end  
556 sequencing was done on an Illumina Hiseq 4000 (Ic-bio, China). Cutadapt software(Martin,  
557 2011) was used to remove low quality reads and adaptor sequences. High quality reads were  
558 then mapped to a C57BL/6 mouse reference genome to which the EYFP sequence was added  
559 using HISAT2(Kim et al., 2015). Readcounts were obtained from bam files with FeatureCounts  
560 using the default parameters. Differential expressed genes (DEGs) were obtained with  
561 DESeq2, using RStudio (RStudio Inc). DEGs were visualised with a volcano plot using the  
562 'Enhancedvolcano' package within R. DEGs with a fold change of at least 3 and q-values less  
563 than  $p=0.05$  were classed as statistically significant. Heatmaps were generated using the  
564 heatmap2 function, using the DESeq2 normalised counts and Panther(Mi et al., 2019) used  
565 to determine GO biological processes. GSEA analysis was conducted using UC San  
566 Diego/Broad Institute's GSEA software(Mootha et al., 2003, Subramanian et al., 2005).

567

568 **ELISA**

569 OVA specific antibody ELISAs were carried out as described(David et al., 2014). Serum from  
570 immunised and control mice was titrated in 2-fold serial dilution on plates coated with OVA  
571 protein. Anti-mouse IgG, IgG1 or IgG2c biotin detection antibodies (Thermofisher, UK) were  
572 used with Extravidin-peroxidase (Sigma Aldrich) and SureBlueTMB substrate (KPL).  
573 Absorbance was measured at 450nm using a Sunrise Absorbance Reader (Tecan). The

574 absorbance of each sample was normalised to a positive control on each plate after the  
575 background absorbance from a blank well had been removed.

### 576 **Statistical analysis**

577 Data were analysed using Prism version 7 software (GraphPad). Differences between groups  
578 were analysed by unpaired ANOVAs or T-tests as indicated in figure legends. In all figures \*  
579 represents a p value of <0.05; \*\*: p>0.01, \*\*\*: p>0.001, \*\*\*\*: p>0.0001.

580

### 581 **Acknowledgements**

582 We thank the staff within the Institute of Infection, Immunity and Inflammation Flow Cytometry  
583 Facility, the Joint and Central Research Facility at the University of Glasgow for technical  
584 assistance. We thank the NIH tetramer core facility for provision of IA<sup>b</sup>-NP<sub>311-325</sub>-PE and Prof  
585 James Stewart (University of Liverpool) for IAV X31. We thank Dr Claire McIntyre and Mr Colin  
586 Chapman for technical assistance and Dr Catharien Hilkens (University of Newcastle) and  
587 Prof David Withers (University of Birmingham) for critical reading of the manuscript. This work  
588 was supported by an Arthritis Research UK Career Development Fellowship (19905) and a  
589 Marie Curie Fellowship (334430) to MKLM, by a DTP-MRC studentship to JIG  
590 (MR/JR50032X/1) and by the Howard Hughes Medical Institute. Transcriptomics data have  
591 been deposited on GEO, accession number GSE145310.

592

593

594 **Competing interest statement:** The authors have no competing interests to declare.

595

596 **Author Contribution:** JIG designed and performed experiments, analysed data and wrote  
597 the manuscript; TO and S-AK analysed data; FM, ETC, LG, JLM, JWK and PM designed and  
598 produced essential tools; PG designed experiments; MKLM designed and performed the  
599 research, analysed data, and wrote the manuscript. All authors approved the manuscript.

600

Supplementary Figure 1

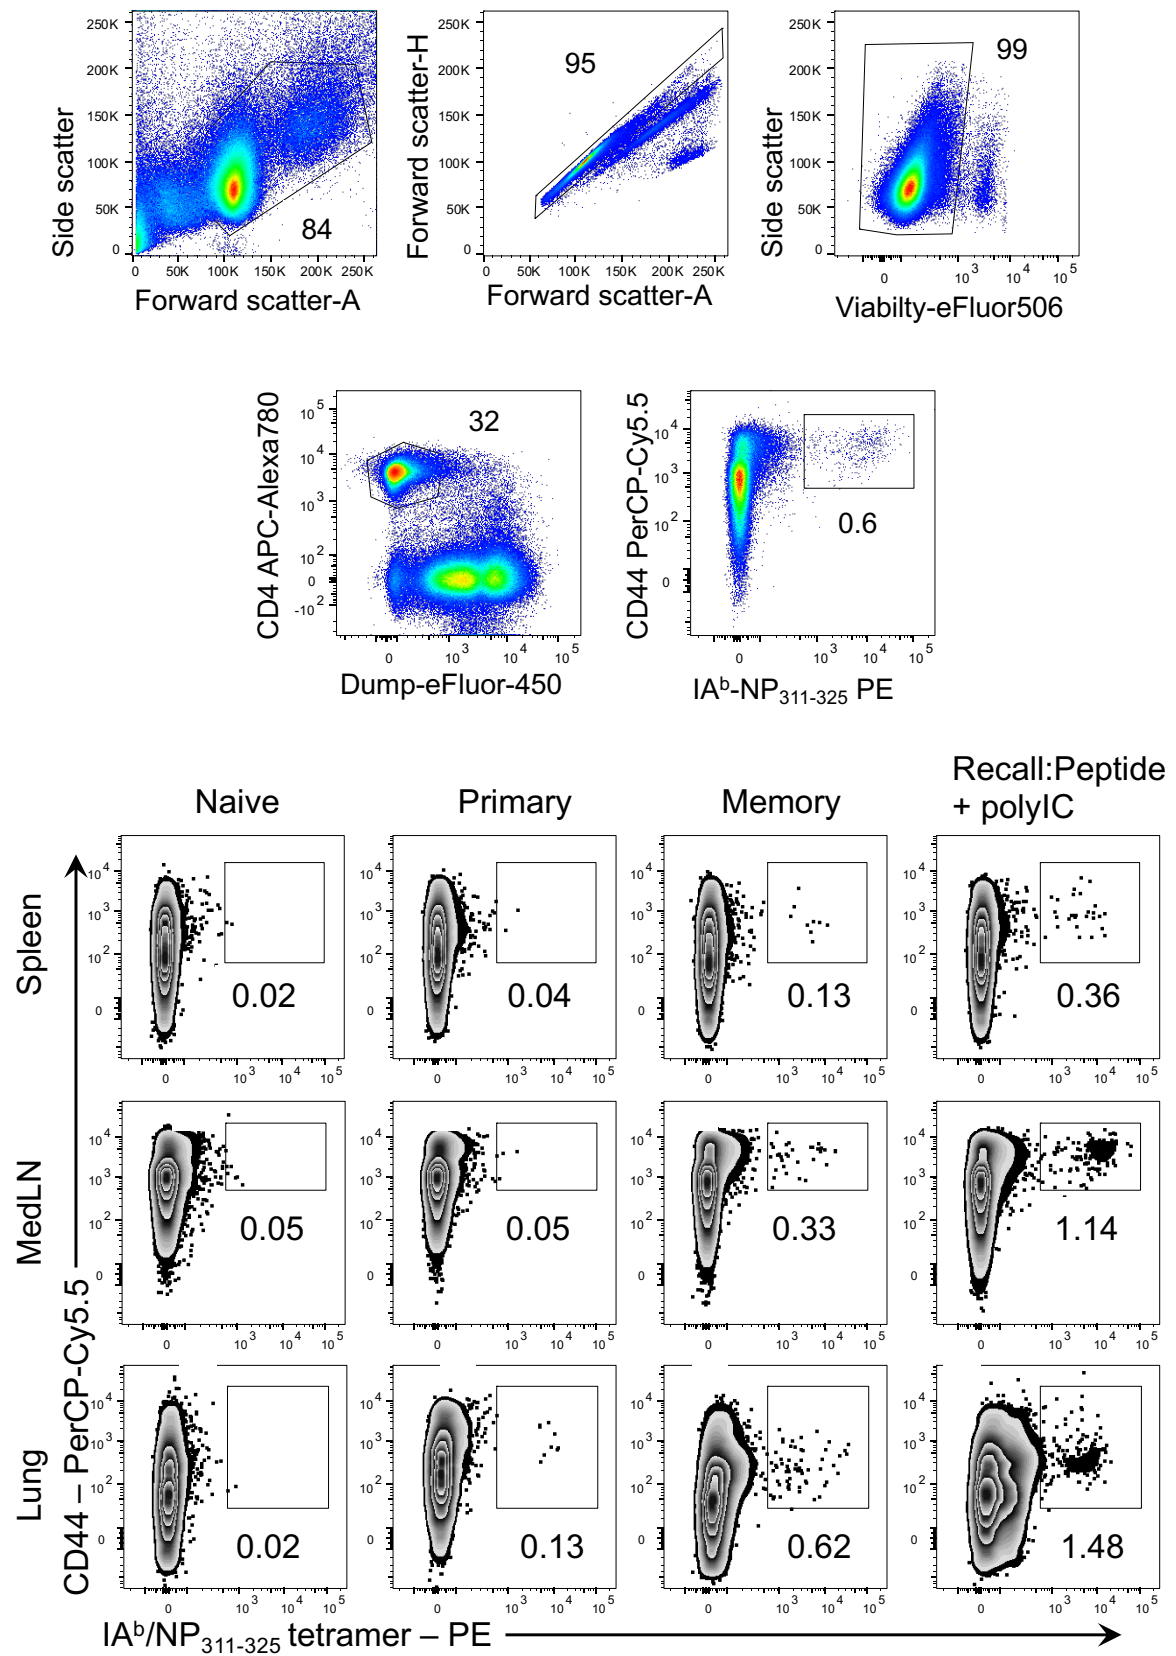



604 **Supplementary Figure 1: Gating strategy for IA<sup>b</sup>/NP<sub>311-325</sub> tetramer+ CD44<sup>hi</sup> cells**

605 C57BL/6 mice were infected with IAV i.n. and some were given NP<sub>311-325</sub> peptide+PolyIC i.n.  
606 on day 30. The percentages of IA<sup>b</sup>/NP<sub>311-325</sub> tetramer+ CD44<sup>hi</sup> CD4 T cells examined 35 days  
607 later in spleen, mediastinal LN, and lung. Cells are gated on live CD4+ lymphocytes that are  
608 negative for B220, F4/80, CD8, and MHCII+ as shown in the gating strategy. The numbers on  
609 the graph show the percentages of the cells present in the gate within each plot.

610

611

Supplementary Figure 2

612

613

614

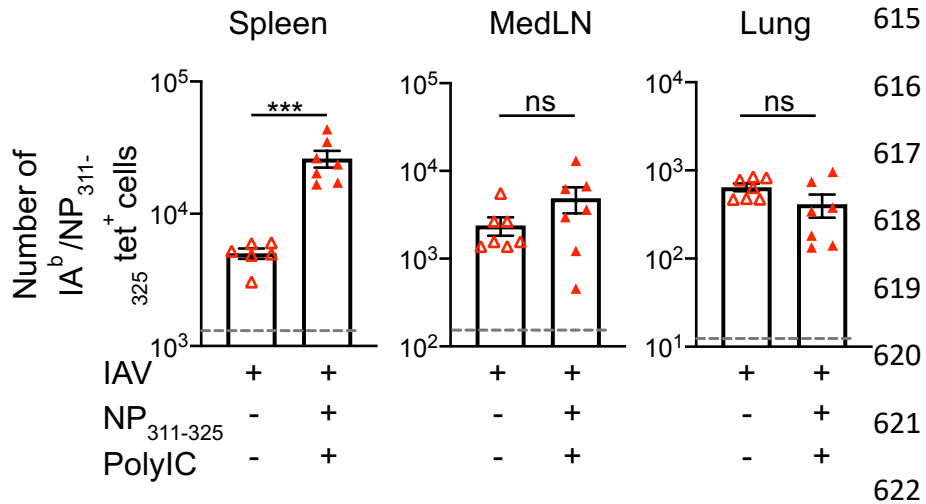

615

616

617

618

619

620

621

622

623

624 **Supplementary Figure 2: Lung memory NP<sub>311-325</sub>-antigen-specific CD4 T cells are not**  
 625 **reactivated by antigen and adjuvant delivered i.v.**

626 C57BL/6 mice were infected with IAV i.n. on day -30. On day 0, some of these mice were  
 627 immunised with NP<sub>311-325</sub> + PolyIC intravenously. The numbers of IA<sup>b</sup>/NP<sub>311-325</sub> CD44<sup>hi</sup> CD4 T  
 628 cells were examined 5 days later in the spleen, MedLN, and lung. Each symbol represents  
 629 one mouse and error bars are SEM. The grey dashed line represents the background staining  
 630 in naïve animals. Data are combined from two experiments (3-4mice/experiment). Statistics  
 631 calculated using a one-way ANOVA with multiple comparisons; ns = not significant, \* = <0.05,  
 632 \*\* = <0.01, \*\*\* = <0.001, \*\*\*\* = <0.0001.

633

634

# Supplementary Figure 3

635

636

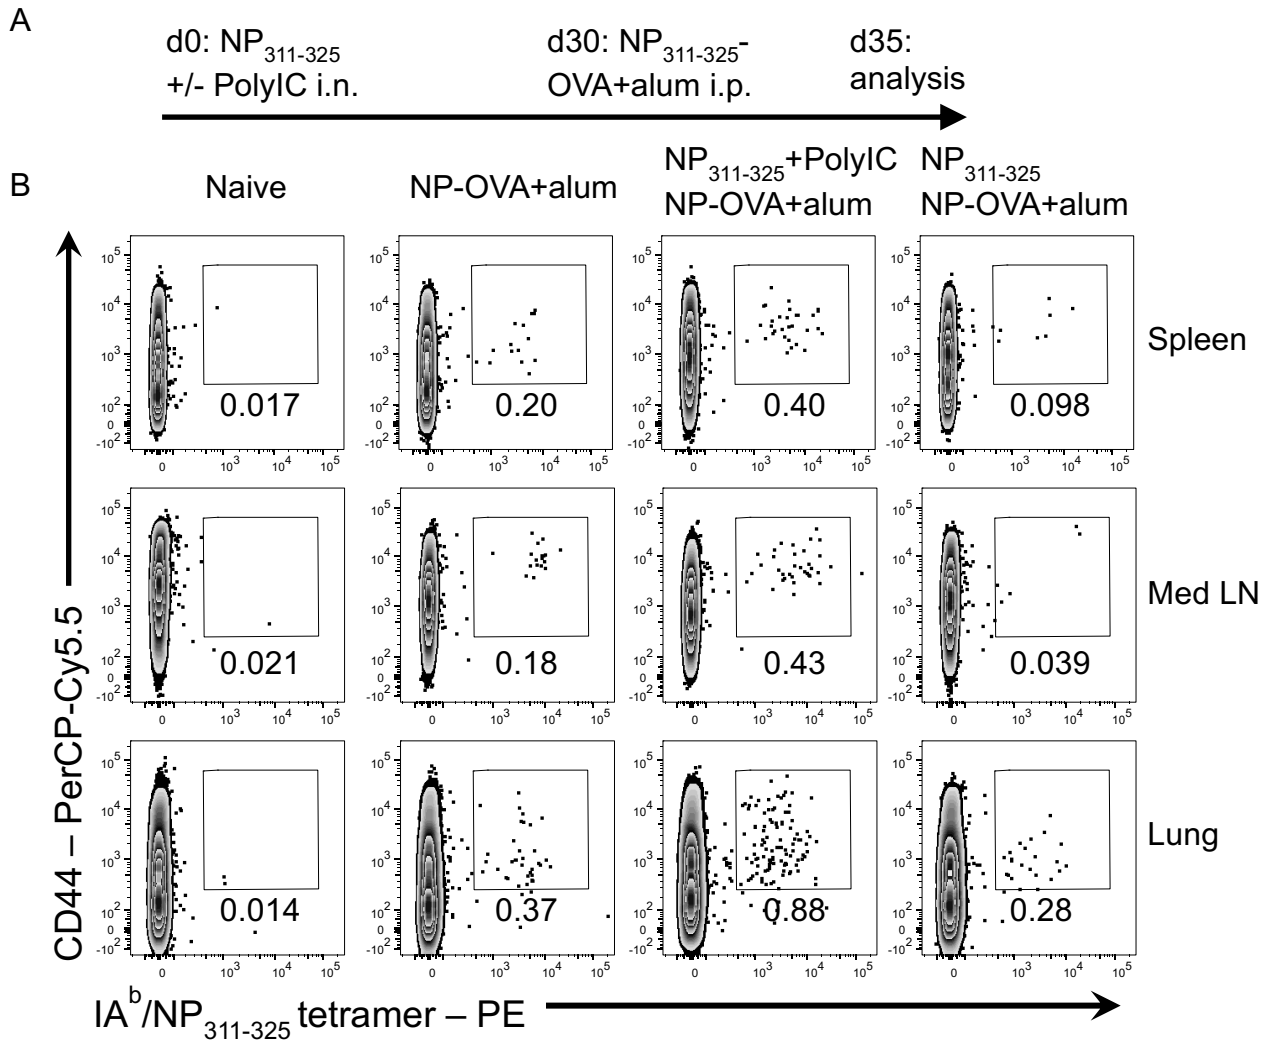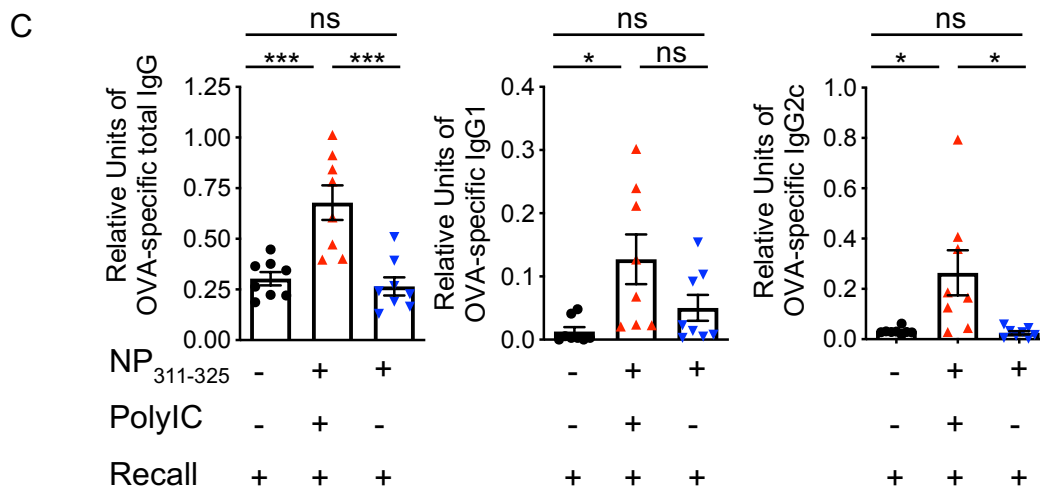

637 **Supplementary Figure 3: Instillation of NP<sub>311-325</sub> peptide induces functional tolerance in**  
638 **naive animals**

639 C57BL/6 mice were instilled with NP<sub>311-325</sub> peptide +/- PolyIC on day 0 and immunised with  
640 NP<sub>311-325</sub>-OVA and alum i.p. 30 days later (A). The percentages of IA<sup>b</sup>/NP<sub>311-325</sub> CD44<sup>hi</sup> CD4 T  
641 cells were examined 5 days after the recall immunisation (B). Cells are gated on live CD4+  
642 lymphocytes that are negative for B220, CD8, F4/80, and MHCII+. The numbers on the graph  
643 show the percentages of the cells present in the gate within each plot. The levels of IgG, IgG1  
644 and IgG2c anti-OVA antibodies was determined on day 5 in the serum (C). Data are from 2  
645 experiments with 4mice/group. In C each point represents one mouse and the error bars are  
646 SEM). All statistics calculated using a one-way ANOVA with multiple comparisons; ns = not  
647 significant, \* = <0.05, \*\* = <0.01, \*\*\* = <0.001.

648

649

# Supplementary Figure 4

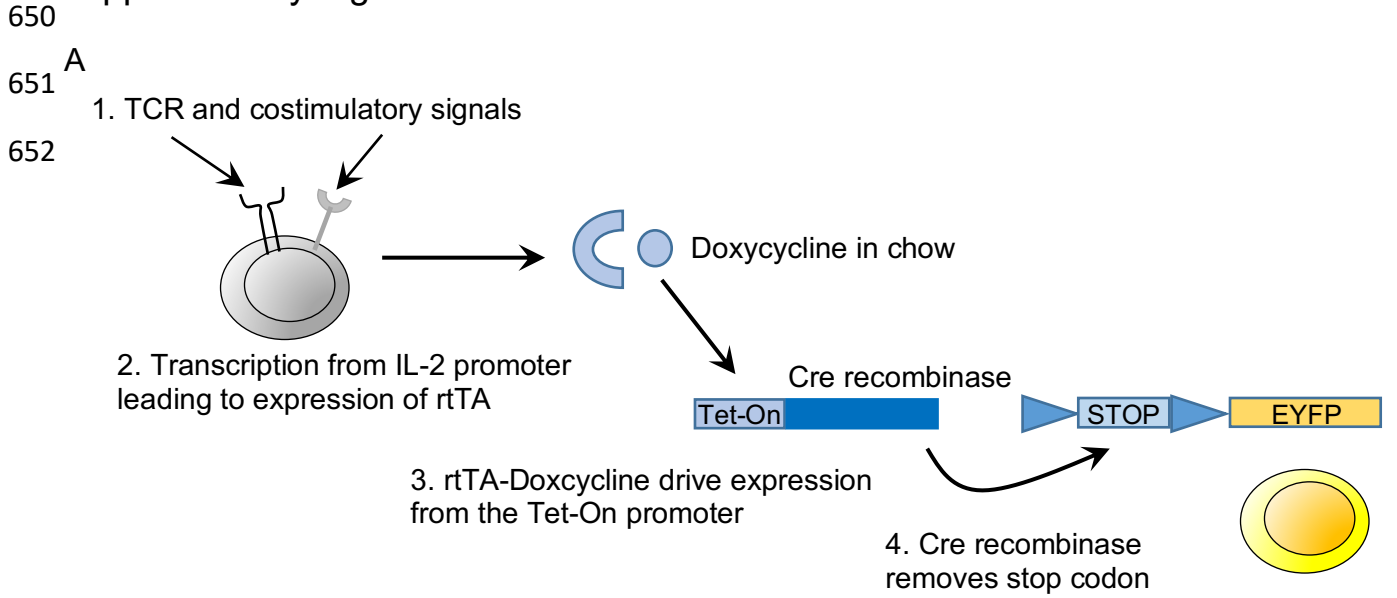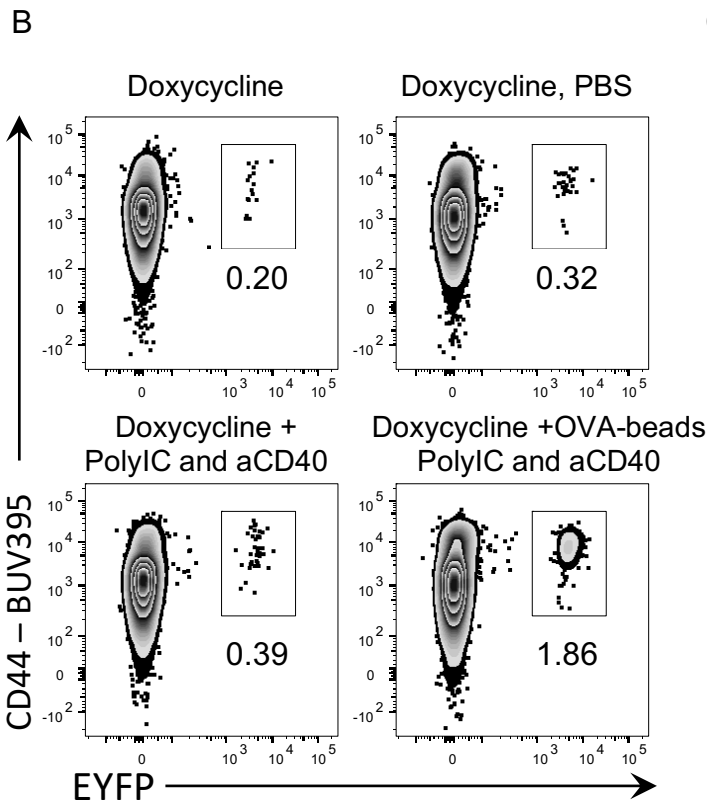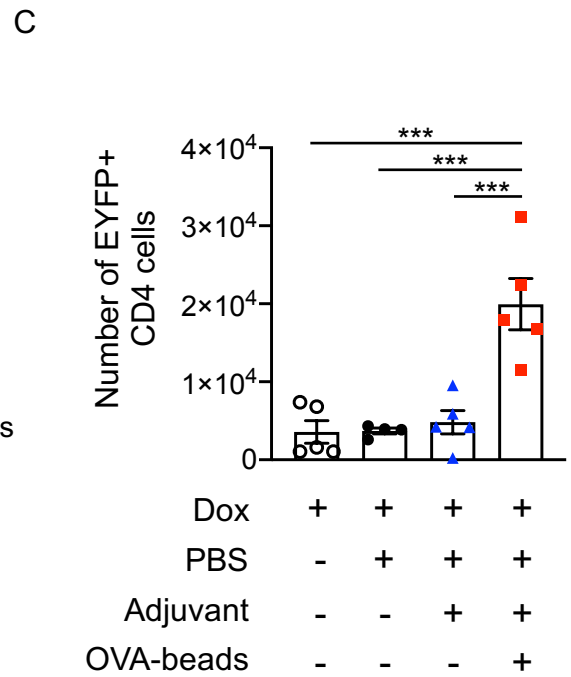

653 **Supplementary Figure 4: TRACE mice enable identification of antigen-reactive CD4 T**  
654 **cells**

655 In TRACE mice, activation through the TCR in the presence of costimulatory signals leads to  
656 the expression of rtTA driven by the interleukin 2 promoter. Only in the presence of doxycycline  
657 will rtTA be able to bind to the tet-ON promoter leading to the expression of Cre recombinase.  
658 Cre recombinase removes the stop codon at the Rosa locus allowing permanent expression  
659 of EYFP (A). In B, TRACE mice were given doxycycline chow from day minus 2 until day 5  
660 and injected in the s.c. in the scruff on day 0 with nothing, PBS, anti-CD40 and PolyIC, or OVA  
661 protein conjugated to 20 $\mu$ m beads delivered with anti-CD40 and PolyIC. On day 9, the brachial  
662 and axillary lymph nodes were examined by flow cytometry. Cells are gated on live  
663 lymphocytes that were CD4+, and negative for B220, F4/80, MHCII and CD8. The numbers  
664 show the percentage of CD4+ cells that are in the indicated gates (A). In B, the numbers of  
665 EYFP+ CD4 T cells in the lymph nodes are shown with each symbol representing one mouse.  
666 Statistics calculated using a one-way ANOVA with multiple comparisons; \*\*\* = <0.001.

667

668

## Supplementary Figure 5

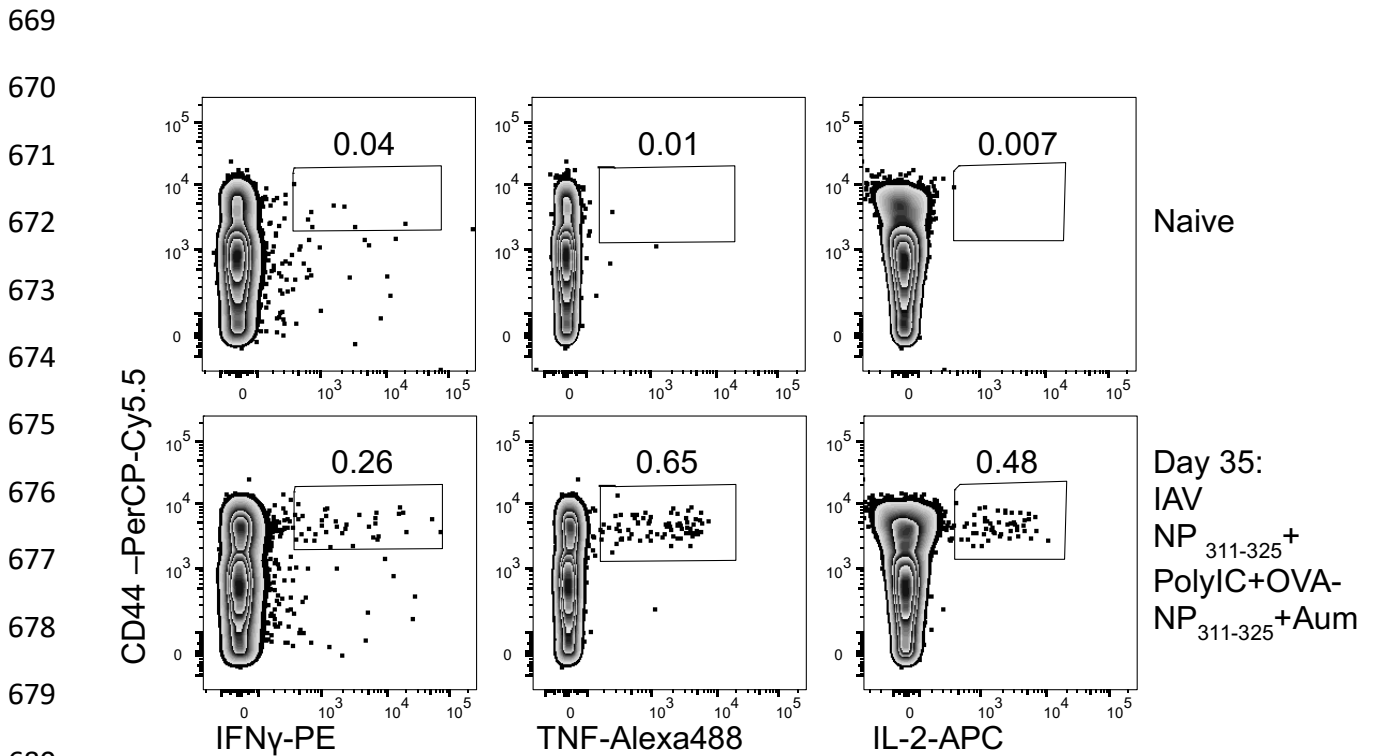

682 **Supplementary Figure 5: Identification of NP<sub>311-325</sub> specific cytokine producing CD4 T**

683 **cells**

684 C57BL/6 mice were infected with IAV on day -30. On day 0, mice received NP<sub>311-325</sub> in the +/-

685 PolyIC and some of these mice immunised i.p with NP-OVA with alum on day 30. On day 35,

686 cells from the spleen were co-cultured with bmDCs loaded with NP<sub>311-325</sub> for 6 hours in the

687 presence of Golgi Plug and the percentages of IFN- $\gamma$ , TNF and IL-2 producing CD44<sup>hi</sup> CD4+

688 T cells examined. Cells are gated on live CD4+ lymphocytes as in gating strategy in SF1. Data

689 are representative of 3 experiments (3-5mice/experiment).

690

691 **References**

692

693 BLAIR, D. A., TURNER, D. L., BOSE, T. O., PHAM, Q. M., BOUCHARD, K. R., WILLIAMS,  
694 K. J., MCALEER, J. P., CAULEY, L. S., VELLA, A. T. & LEFRANCOIS, L. 2011.

695 Duration of antigen availability influences the expansion and memory differentiation  
696 of T cells. *J Immunol*, 187, 2310-21.

697 BOHMER, R. M., BANDALA-SANCHEZ, E. & HARRISON, L. C. 2011. Forward light scatter  
698 is a simple measure of T-cell activation and proliferation but is not universally suited  
699 for doublet discrimination. *Cytometry A*, 79, 646-52.

700 COPE, A. P., SCHULZE-KOOPS, H. & ARINGER, M. 2007. The central role of T cells in  
701 rheumatoid arthritis. *Clin Exp Rheumatol*, 25, S4-11.

702 DAVID, A., CRAWFORD, F., GARSIDE, P., KAPPLER, J. W., MARRACK, P. & MACLEOD,  
703 M. 2014. Tolerance induction in memory CD4 T cells requires two rounds of antigen-  
704 specific activation. *Proc Natl Acad Sci U S A*, 111, 7735-40.

705 DUTTA, A., MIAW, S. C., YU, J. S., CHEN, T. C., LIN, C. Y., LIN, Y. C., CHANG, C. S., HE,  
706 Y. C., CHUANG, S. H., YEN, M. I. & HUANG, C. T. 2013. Altered T-bet dominance in  
707 IFN-gamma-decoupled CD4+ T cells with attenuated cytokine storm and preserved  
708 memory in influenza. *J Immunol*, 190, 4205-14.

709 GREENWALD, R. J., FREEMAN, G. J. & SHARPE, A. H. 2005. The B7 family revisited.  
710 *Annu Rev Immunol*, 23, 515-48.

711 GUNAWARDANA, N. C. & DURHAM, S. R. 2018. New approaches to allergen  
712 immunotherapy. *Ann Allergy Asthma Immunol*, 121, 293-305.

713 HANS, F. & DIMITROV, S. 2001. Histone H3 phosphorylation and cell division. *Oncogene*,  
714 20, 3021-7.

715 HARDWICK, K. G. & MURRAY, A. W. 1995. Mad1p, a phosphoprotein component of the  
716 spindle assembly checkpoint in budding yeast. *J Cell Biol*, 131, 709-20.

717 HARTIGAN, C. R., SUN, H. & FORD, M. L. 2019. Memory T-cell exhaustion and tolerance in  
718 transplantation. *Immunol Rev*, 292, 225-242.



719 HOLZER, U., KWOK, W. W., NEPOM, G. T. & BUCKNER, J. H. 2003. Differential antigen  
720 sensitivity and costimulatory requirements in human Th1 and Th2 antigen-specific  
721 CD4+ cells with similar TCR avidity. *J Immunol*, 170, 1218-23.

722 INABA, K., INABA, M., ROMANI, N., AYA, H., DEGUCHI, M., IKEHARA, S., MURAMATSU,  
723 S. & STEINMAN, R. M. 1992. Generation of large numbers of dendritic cells from  
724 mouse bone marrow cultures supplemented with granulocyte/macrophage colony-  
725 stimulating factor. *J Exp Med*, 176, 1693-702.

726 JAIGIRDAR, S. A. & MACLEOD, M. K. 2015. Development and Function of Protective and  
727 Pathologic Memory CD4 T Cells. *Front Immunol*, 6, 456.

728 JENKINS, M. K. & SCHWARTZ, R. H. 1987. Antigen presentation by chemically modified  
729 splenocytes induces antigen-specific T cell unresponsiveness in vitro and in vivo. *J*  
730 *Exp Med*, 165, 302-19.

731 JOUKOV, V. & DE NICOLO, A. 2018. Aurora-PLK1 cascades as key signaling modules in  
732 the regulation of mitosis. *Sci Signal*, 11.

733 KIM, D., LANGMEAD, B. & SALZBERG, S. L. 2015. HISAT: a fast spliced aligner with low  
734 memory requirements. *Nat Methods*, 12, 357-60.

735 KIMURA, M., YOSHIOKA, T., SAIO, M., BANNO, Y., NAGAOKA, H. & OKANO, Y. 2013.  
736 Mitotic catastrophe and cell death induced by depletion of centrosomal proteins. *Cell*  
737 *Death Dis*, 4, e603.

738 KURCHE, J. S., BURCHILL, M. A., SANCHEZ, P. J., HALUSZCZAK, C. & KEDL, R. M.  
739 2010. Comparison of OX40 ligand and CD70 in the promotion of CD4+ T cell  
740 responses. *J Immunol*, 185, 2106-15.

741 LIBLAU, R. S., TISCH, R., SHOKAT, K., YANG, X., DUMONT, N., GOODNOW, C. C. &  
742 MCDEVITT, H. O. 1996. Intravenous injection of soluble antigen induces thymic and  
743 peripheral T-cells apoptosis. *Proc Natl Acad Sci U S A*, 93, 3031-6.

744 LIU, X., WANG, Y., LU, H., LI, J., YAN, X., XIAO, M., HAO, J., ALEKSEEV, A., KHONG, H.,  
745 CHEN, T., HUANG, R., WU, J., ZHAO, Q., WU, Q., XU, S., WANG, X., JIN, W., YU,  
746 S., WANG, Y., WEI, L., WANG, A., ZHONG, B., NI, L., LIU, X., NURIEVA, R., YE, L.,

747 TIAN, Q., BIAN, X. W. & DONG, C. 2019. Genome-wide analysis identifies NR4A1  
748 as a key mediator of T cell dysfunction. *Nature*, 567, 525-529.

749 LIZARRAGA, S. B., MARGOSSIAN, S. P., HARRIS, M. H., CAMPAGNA, D. R., HAN, A. P.,  
750 BLEVINS, S., MUDBHARY, R., BARKER, J. E., WALSH, C. A. & FLEMING, M. D.  
751 2010. Cdk5rap2 regulates centrosome function and chromosome segregation in  
752 neuronal progenitors. *Development*, 137, 1907-17.

753 LONDON, C. A., LODGE, M. P. & ABBAS, A. K. 2000. Functional responses and  
754 costimulator dependence of memory CD4+ T cells. *J Immunol*, 164, 265-72.

755 MACKENZIE, K. J., NOWAKOWSKA, D. J., LEECH, M. D., MCFARLANE, A. J., WILSON,  
756 C., FITCH, P. M., O'CONNOR, R. A., HOWIE, S. E., SCHWARZE, J. & ANDERTON,  
757 S. M. 2014. Effector and central memory T helper 2 cells respond differently to  
758 peptide immunotherapy. *Proc Natl Acad Sci U S A*, 111, E784-93.

759 MACLEOD, M., KWAKKENBOS, M. J., CRAWFORD, A., BROWN, S., STOCKINGER, B.,  
760 SCHEPERS, K., SCHUMACHER, T. & GRAY, D. 2006. CD4 memory T cells survive  
761 and proliferate but fail to differentiate in the absence of CD40. *J Exp Med*, 203, 897-  
762 906.

763 MACLEOD, M. K. & ANDERTON, S. M. 2015. Antigen-based immunotherapy (AIT) for  
764 autoimmune and allergic disease. *Curr Opin Pharmacol*, 23, 11-6.

765 MACLEOD, M. K., DAVID, A., JIN, N., NOGES, L., WANG, J., KAPPLER, J. W. &  
766 MARRACK, P. 2013. Influenza nucleoprotein delivered with aluminium salts protects  
767 mice from an influenza A virus that expresses an altered nucleoprotein sequence.  
768 *PLoS One*, 8, e61775.

769 MACLEOD, M. K., DAVID, A., MCKEE, A. S., CRAWFORD, F., KAPPLER, J. W. &  
770 MARRACK, P. 2011. Memory CD4 T cells that express CXCR5 provide accelerated  
771 help to B cells. *J Immunol*, 186, 2889-96.

772 MACLEOD, M. K., MCKEE, A., CRAWFORD, F., WHITE, J., KAPPLER, J. & MARRACK, P.  
773 2008. CD4 memory T cells divide poorly in response to antigen because of their  
774 cytokine profile. *Proc Natl Acad Sci U S A*, 105, 14521-6.

775 MARTIN, M. 2011. Cutadapt removes adapter sequences from high-throughput sequencing  
776 reads. *EMBnet.journal*, 17.

777 MASKEY, D., YOUSEFI, S., SCHMID, I., ZLOBEC, I., PERREN, A., FRIIS, R. & SIMON, H.  
778 U. 2013. ATG5 is induced by DNA-damaging agents and promotes mitotic  
779 catastrophe independent of autophagy. *Nat Commun*, 4, 2130.

780 MC GEE, M. M. 2015. Targeting the Mitotic Catastrophe Signaling Pathway in Cancer.  
781 *Mediators Inflamm*, 2015, 146282.

782 MCGINLEY, A. M., EDWARDS, S. C., RAVERDEAU, M. & MILLS, K. H. G. 2018. Th17 cells,  
783 gammadelta T cells and their interplay in EAE and multiple sclerosis. *J Autoimmun*.

784 MI, H., MURUGANUJAN, A., EBERT, D., HUANG, X. & THOMAS, P. D. 2019. PANTHER  
785 version 14: more genomes, a new PANTHER GO-slim and improvements in  
786 enrichment analysis tools. *Nucleic Acids Res*, 47, D419-D426.

787 MILLER, S. D., TURLEY, D. M. & PODOJIL, J. R. 2007. Antigen-specific tolerance  
788 strategies for the prevention and treatment of autoimmune disease. *Nat Rev*  
789 *Immunol*, 7, 665-77.

790 MOOTHA, V. K., LINDGREN, C. M., ERIKSSON, K. F., SUBRAMANIAN, A., SIHAG, S.,  
791 LEHAR, J., PUIGSERVER, P., CARLSSON, E., RIDDERSTRALE, M., LAURILA, E.,  
792 HOUSTIS, N., DALY, M. J., PATTERSON, N., MESIROV, J. P., GOLUB, T. R.,  
793 TAMAYO, P., SPIEGELMAN, B., LANDER, E. S., HIRSCHHORN, J. N.,  
794 ALTSHULER, D. & GROOP, L. C. 2003. PGC-1alpha-responsive genes involved in  
795 oxidative phosphorylation are coordinately downregulated in human diabetes. *Nat*  
796 *Genet*, 34, 267-73.

797 MUSACCHIO, A. 2015. The Molecular Biology of Spindle Assembly Checkpoint Signaling  
798 Dynamics. *Curr Biol*, 25, R1002-18.

799 NITTA, M., KOBAYASHI, O., HONDA, S., HIROTA, T., KUNINAKA, S., MARUMOTO, T.,  
800 USHIO, Y. & SAYA, H. 2004. Spindle checkpoint function is required for mitotic  
801 catastrophe induced by DNA-damaging agents. *Oncogene*, 23, 6548-58.

802 NURIEVA, R., THOMAS, S., NGUYEN, T., MARTIN-OROZCO, N., WANG, Y., KAJA, M. K.,  
803 YU, X. Z. & DONG, C. 2006. T-cell tolerance or function is determined by  
804 combinatorial costimulatory signals. *EMBO J*, 25, 2623-33.

805 NURIEVA, R. I., LIU, X. & DONG, C. 2011. Molecular mechanisms of T-cell tolerance.  
806 *Immunol Rev*, 241, 133-44.

807 PEARSON, R. M., CASEY, L. M., HUGHES, K. R., MILLER, S. D. & SHEA, L. D. 2017. In  
808 vivo reprogramming of immune cells: Technologies for induction of antigen-specific  
809 tolerance. *Adv Drug Deliv Rev*, 114, 240-255.

810 RAPHAEL, I., JOERN, R. R. & FORSTHUBER, T. G. 2020. Memory CD4(+) T Cells in  
811 Immunity and Autoimmune Diseases. *Cells*, 9.

812 RAYNER, F. & ISAACS, J. D. 2018. Therapeutic tolerance in autoimmune disease. *Semin*  
813 *Arthritis Rheum*, 48, 558-562.

814 SANTAMARIA, D., BARRIERE, C., CERQUEIRA, A., HUNT, S., TARDY, C., NEWTON, K.,  
815 CACERES, J. F., DUBUS, P., MALUMBRES, M. & BARBACID, M. 2007. Cdk1 is  
816 sufficient to drive the mammalian cell cycle. *Nature*, 448, 811-5.

817 SERRA, P. & SANTAMARIA, P. 2019. Antigen-specific therapeutic approaches for  
818 autoimmunity. *Nat Biotechnol*, 37, 238-251.

819 SHANG, Z. F., HUANG, B., XU, Q. Z., ZHANG, S. M., FAN, R., LIU, X. D., WANG, Y. &  
820 ZHOU, P. K. 2010. Inactivation of DNA-dependent protein kinase leads to spindle  
821 disruption and mitotic catastrophe with attenuated checkpoint protein 2  
822 Phosphorylation in response to DNA damage. *Cancer Res*, 70, 3657-66.

823 SUBRAMANIAN, A., TAMAYO, P., MOOTHA, V. K., MUKHERJEE, S., EBERT, B. L.,  
824 GILLETTE, M. A., PAULOVICH, A., POMEROY, S. L., GOLUB, T. R., LANDER, E.  
825 S. & MESIROV, J. P. 2005. Gene set enrichment analysis: a knowledge-based  
826 approach for interpreting genome-wide expression profiles. *Proc Natl Acad Sci U S*  
827 *A*, 102, 15545-50.

828 TEN BRINKE, A., MARTINEZ-LLOREDELLA, M., COOLS, N., HILKENS, C. M. U., VAN  
829 HAM, S. M., SAWITZKI, B., GEISLER, E. K., LOMBARDI, G., TRZONKOWSKI, P.

830           & MARTINEZ-CACERES, E. 2019. Ways Forward for Tolerance-Inducing Cellular  
831           Therapies- an AFACTT Perspective. *Front Immunol*, 10, 181.

832 THOMAS, P. G., BROWN, S. A., MORRIS, M. Y., YUE, W., SO, J., REYNOLDS, C.,  
833           WEBBY, R. J. & DOHERTY, P. C. 2010. Physiological numbers of CD4+ T cells  
834           generate weak recall responses following influenza virus challenge. *J Immunol*, 184,  
835           1721-7.

836 VAKIFAHMETOGLU, H., OLSSON, M. & ZHIVOTOVSKY, B. 2008. Death through a  
837           tragedy: mitotic catastrophe. *Cell Death Differ*, 15, 1153-62.

838 ZHANG, J., GAO, W., YANG, X., KANG, J., ZHANG, Y., GUO, Q., HU, Y., XIA, G. & KANG,  
839           Y. 2013. Tolerogenic vaccination reduced effector memory CD4 T cells and induced  
840           effector memory Treg cells for type I diabetes treatment. *PLoS One*, 8, e70056.

841 ZHANG, X., LIU, D., LV, S., WANG, H., ZHONG, X., LIU, B., WANG, B., LIAO, J., LI, J.,  
842           PFEIFER, G. P. & XU, X. 2009. CDK5RAP2 is required for spindle checkpoint  
843           function. *Cell Cycle*, 8, 1206-16.

844
